# Supplementary material for: Exploring sample preparation and data evaluation strategies for enhanced identification of host cell proteins in drug products of therapeutic antibodies and Fc-fusion proteins
Source: PubMed Central journal article supplement (PMC7442769; doi:10.1007/s00216-020-02796-1), 2020-07-20
Supplement: 216_2020_2796_MOESM1_ESM.pdf [file 216_2020_2796_MOESM1_ESM.pdf]

## **Analytical and Bioanalytical Chemistry**

### **Electronic Supplementary Material**

#### **Exploring sample preparation and data evaluation strategies for enhanced identification of host cell proteins in drug products of therapeutic antibodies and Fc-fusion proteins**

Wolfgang Esser-Skala, Marius Segl, Therese Wohlschlager, Veronika Reisinger, Johann Holzmann, Christian G. Huber

Additional files available under “Supplementary material”.

# Contents

|                                                       |    |
|-------------------------------------------------------|----|
| <i>Supplementary figures</i>                          | 3  |
| Figure S1 . . . . .                                   | 3  |
| Figure S2 . . . . .                                   | 4  |
| Figure S3 . . . . .                                   | 5  |
| Figure S4 . . . . .                                   | 6  |
| Figure S5 . . . . .                                   | 6  |
| Figure S6 . . . . .                                   | 7  |
| <i>Supplementary files</i>                            | 8  |
| Supplementary file 1: <code>data.zip</code> . . . . . | 8  |
| <i>Code for data analysis and figures</i>             | 9  |
| Preparation of datasets . . . . .                     | 9  |
| Jaccard distance calculation . . . . .                | 19 |
| Figure 1: Workflow . . . . .                          | 22 |
| Figure 2a: Peptide count . . . . .                    | 22 |
| Figure 2b: HCP count . . . . .                        | 24 |
| Figure 3: Protein abundances . . . . .                | 26 |
| Figure 4: Repeatability . . . . .                     | 28 |
| Figure 5: HCP Jaccard plots . . . . .                 | 31 |
| Other analyses . . . . .                              | 34 |
| <i>Code for supporting figures</i>                    | 42 |
| Figure S1: Retention time stability . . . . .         | 42 |
| Figure S2a: PPM distribution . . . . .                | 43 |
| Figure S2b: MS1 correlation distribution . . . . .    | 44 |
| Figure S3a: Peptide credibility . . . . .             | 46 |
| Figure S3b: HCP credibility . . . . .                 | 49 |
| Figure S4: Distribution over drugs . . . . .          | 52 |
| Figure S5: Overlap flow-through/wash . . . . .        | 54 |
| Figure S6: Peptide Jaccard plots . . . . .            | 58 |
| <i>Session info</i>                                   | 62 |
| <i>References</i>                                     | 65 |

## Supplementary figures

Figure S1

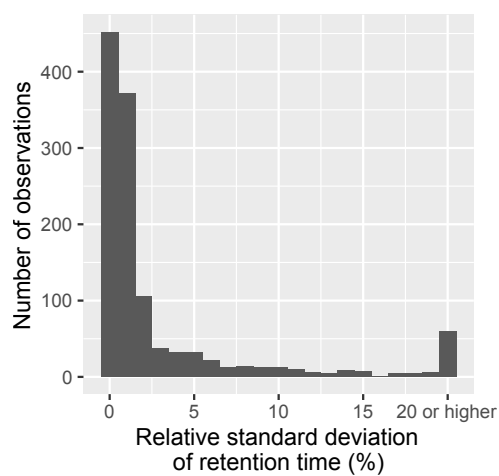

Chromatographic repeatability, as measured by relative standard deviations of peptide retention times. Each observation corresponds to the standard deviation of all retention times observed across all chromatographic runs for a given peptide with a given set of modifications, divided by the mean of these retention times.

Figure S2

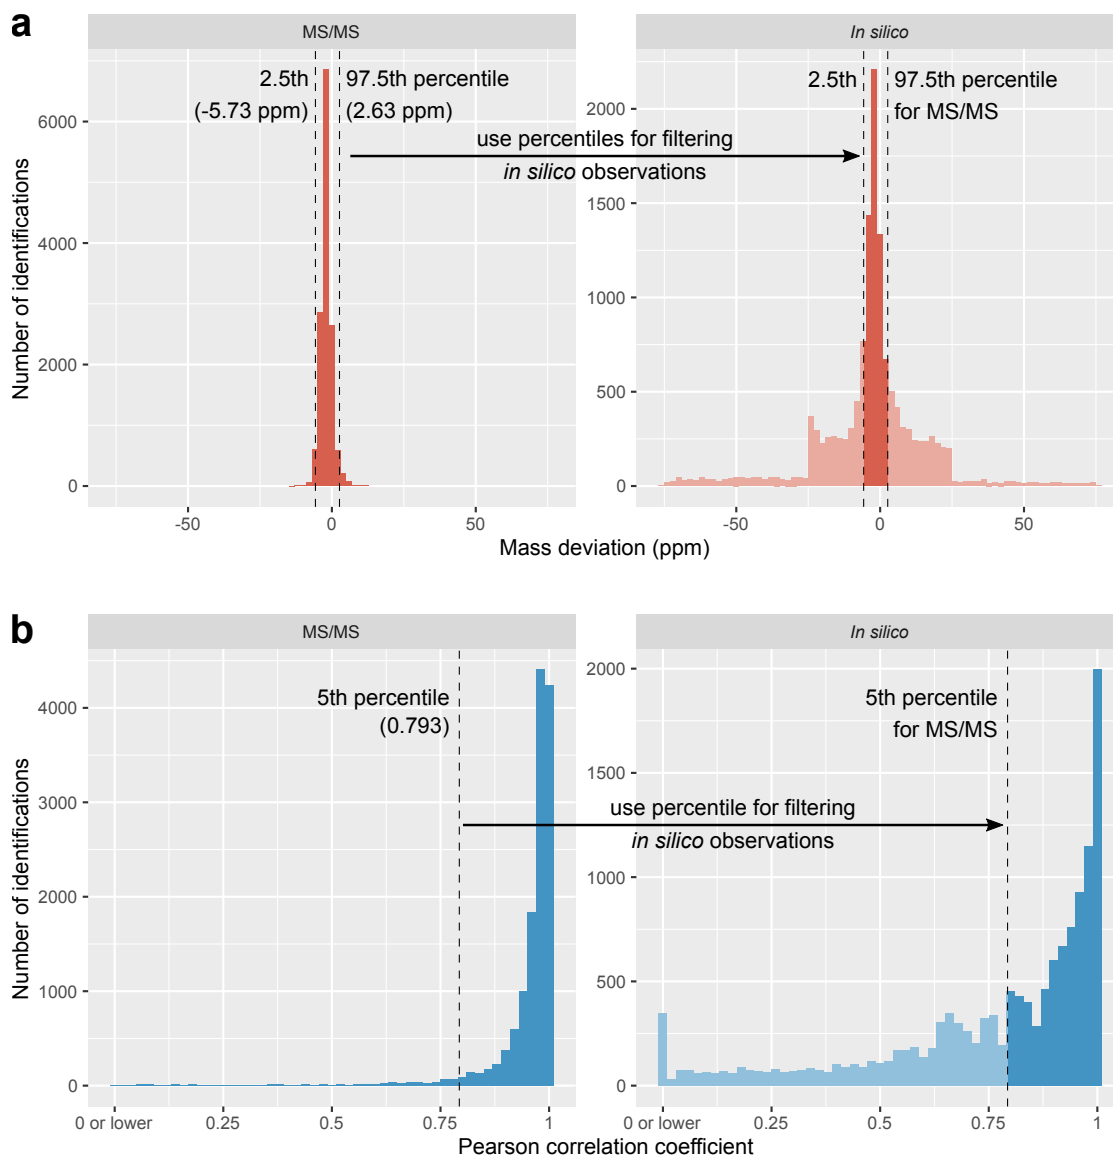

Distribution of (a) deviations from the theoretical mass and (b) Pearson correlation coefficients between the experimental isotope distribution and the theoretical average distribution for peptides detected *via* fragment ion spectra (MS/MS) and putative *in silico* peptides, respectively (*i.e.*, peptides identified on the full-scan MS level). Histograms were derived from all drug products, fractions, and replicates (27523 observations). Arrows indicate that percentiles calculated for MS/MS data were used for filtering *in silico* data.

Figure S3

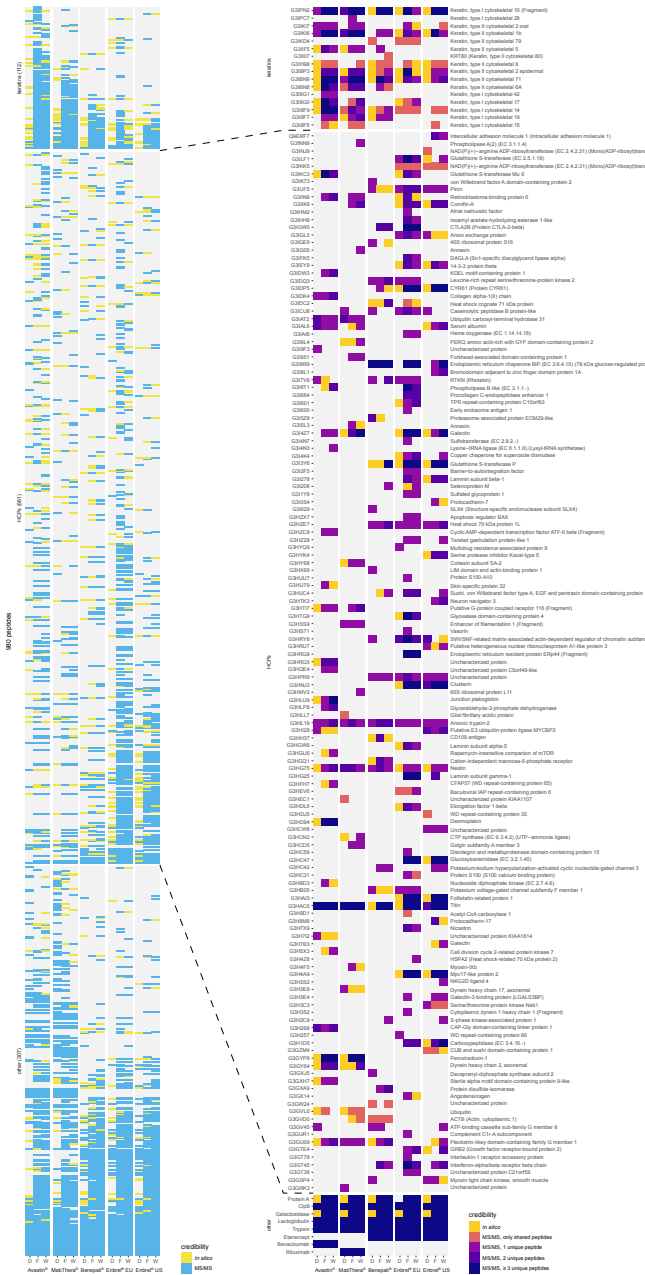

Peptides (left) and proteins (right) identified in the direct workflow (D) and in the flow-through (F) and wash (W) fractions of the depletion workflow for each drug product (vertical subdivisions). Horizontal subdivisions and dashed lines group observations into keratins, HCPs, and other proteins. Colors indicate credibility of detection. (*Zoom in to view details.*)

Figure S4

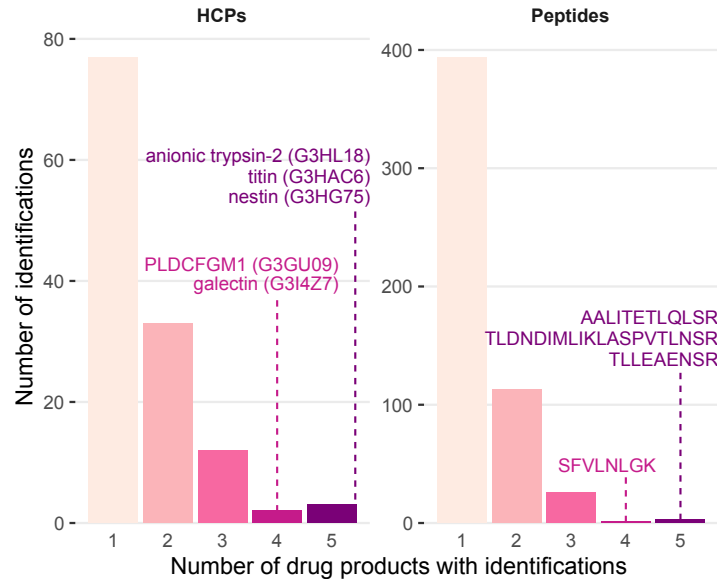

Number of HCPs and HCP-derived peptides identified across several drug products. Proteins and peptides shared by four or five drug products are quoted by name or sequence, respectively.

Figure S5

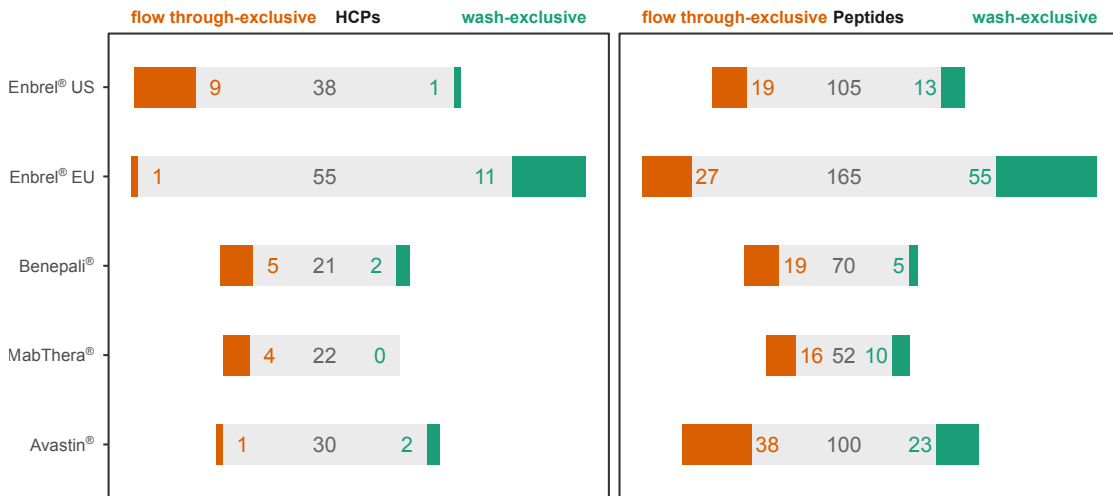

Number of HCPs and HCP-derived peptides that are either found in both fractions collected during the depletion workflow (gray), or only occur in the flow-through (brown) or wash (green) fraction, respectively.

Figure S6

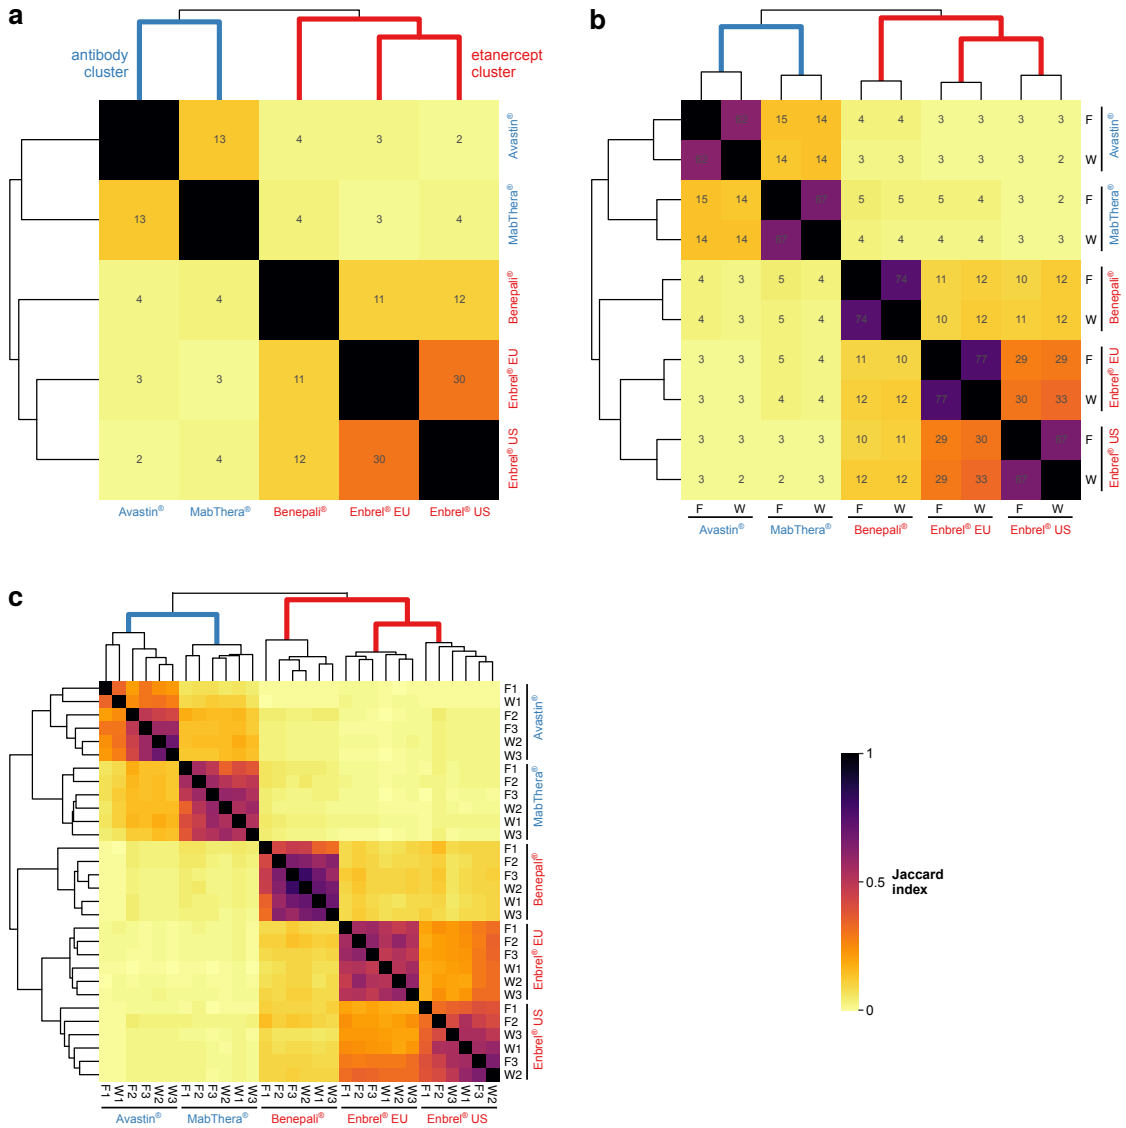

Comparison of HCP-derived peptide profiles on the level of (a) drug products, (b) flow-through (F) and wash (W) fractions from the depletion workflow, and (c) replicates 1 to 3 for these fractions. Heatmap colors correspond to Jaccard indices  $J$ , whose numerical values appear in heatmaps (a) and (b) in percent. Dendrograms and derived row and column orders result from hierarchical clustering employing Jaccard distances  $1 - J$  as measure of dissimilarity. Calculation of Jaccard indices involved *in silico* peptides as well as those detected on the MS/MS level. The antibody and etanercept clusters are highlighted in blue and red, respectively.

## Supplementary files

### Supplementary file 1: data.zip

Files in this ZIP archive allow to reproduce all results presented in the manuscript. CSV files comply with RFC 4180<sup>1</sup>, with a hash character in column 1 denoting comment lines.

The folder `data/` contains two subfolders:

- `byologic/` – Byologic® search results for the five investigated drug products
- `sequence_databases/` – databases in FASTA format containing Chinese Hamster Ovary cell protein sequences, supplemented with sequences of the respective drug substance, protein A, trypsin, *E. coli* ClpB and  $\beta$ -galactosidase, and bovine  $\beta$ -lactoglobulin

In addition, `supporting_information.Rmd` contains this document in R Markdown format<sup>2</sup>. Conversion to PDF *via* `knitr`<sup>3</sup> requires `citation-style.csl`, `orcid.pdf`, `references.bib`, `si_template.tex`, and all files in `supplementary_figures/`.



## Code for data analysis and figures

Data analysis was conducted in R<sup>4</sup> using packages from the tidyverse<sup>5</sup> and Bioconductor<sup>6</sup>. Publication-quality figures were prepared with Inkscape v0.91 (<https://inkscape.org>) and GIMP v2.8.16 (<https://www.gimp.org>).

```
library(Biostrings)
library(tidyverse)
library(pheatmap)
library(viridis)
library(janitor)
library(fs)
library(httr)
```

Save generated figures in `./raw_figures/`. Create this folder if necessary.

```
dir.create(file.path(".", "raw_figures"), showWarnings = FALSE)
ggsave_default <- function(filename, ...) {
  ggsave(str_glue("raw_figures/{filename}.svg"), units = "cm", ...)
}
```

HCP credibility uses five colors from the colorblind-friendly Plasma color scale (<http://bids.github.io/colormap/>).

```
color_scale_credibility_hcp <- c(
  plasma(4, direction = -1, end = .9)[1:2],
  plasma(3, direction = -1, end = .3)
)
```

## Preparation of datasets

Load data that was exported from Byologic®, ensuring that columns have the correct data type. Moreover, remove rows with a missing PPM value, since those observations correspond to incorrectly assigned *in silico* peptides.

```
peptide_data_raw <-
  dir_ls("data/byologic/", type = "file") %>%
  map_dfr(
    read_csv,
    col_types = cols(
      "Var. Pos.\r\nProtein" = "c",
      "_mod\r\nids" = "c",
      "Var. Pos.\r\nPeptide" = "c",
      "Start\r\nAA" = "c",
    )
  )
```

```

      "End\r\nAA" = "c",
      "Protein\r\nannotation" = "c",
      "Peptide Ranking" = "c"
    ),
    .id = "drug"
  ) %>%
  extract(drug, into = "drug", regex = "/([a-z_]*\\.\\.\\.)" %>%
  clean_names() %>%
  mutate(
    in_silico =
      in_silico %>%
      str_replace("Yes", "TRUE") %>%
      replace_na("FALSE") %>%
      parse_logical()
  ) %>%
  unite(samples, replicates, col = "sample", sep = "") %>%
  rename(protein = protein_accession) %>%
  {
    bind_rows(
      filter(., in_silico) %>%
      mutate(
        ms1_correlation = parse_double(ms1_correlation),
        ppm = parse_double(ppm)
      ),
      filter(., !in_silico) %>%
      mutate(
        ms1_correlation =
          ms1_correlation %>%
          str_split(";") %>%
          map_dbl(~.x %>% parse_double() %>% mean()),
        ppm =
          ppm %>%
          str_split(";") %>%
          map_dbl(~.x %>% parse_double() %>% mean())
      )
    )
  } %>%
  filter(!is.na(ppm))

```

Send a query to the UniProt `uploadlists` API in order to retrieve protein names associated with the identifiers in the Byologic® search results. This query yields the data frame `protein_data`.

```

uniprot_query_ids <-
  peptide_data_raw %>%
  extract(
    protein_name,
    into = "protein_id",
    regex = "\\|([:alnum:]+)\\|"
  ) %>%
  pull(protein_id) %>%
  unique() %>%
  str_c(collapse = " ")

uniprot_query_params <- list(
  from = "ACC+ID",
  to = "ACC",
  format = "tab",
  query = uniprot_query_ids,
  columns = "id,protein names"
)

uniprot_response <- POST(
  "https://www.uniprot.org/uploadlists/",
  query = uniprot_query_params
)

protein_data <-
  uniprot_response %>%
  content() %>%
  read_tsv() %>%
  select(entry = Entry, name = `Protein names`) %>%
  arrange(entry)

```

Vectors containing names of “non-HCPs”, *i.e.*, the drug substances, trypsin, protein A, and standard proteins.

```

non_hcps_database <- c(
  "Rituximab",
  "Avastin",
  "Etanercept",
  "Trypsin",
  "Lactoglobulin",
  "Galactosidase",
  "ClpB",
  "ProteinA"
)

```

```
)
non_hcps <- c(
  "Rituximab",
  "Bevacizumab",
  "Etanercept",
  "Trypsin",
  "Lactoglobulin",
  "Galactosidase",
  "ClpB",
  "Protein A"
)
```

`keratins` contains UniProt identifiers of keratins, which are putative contaminants. `cho_sequences` is a named character vector containing all protein sequences in the CHO cell database.

```
keratins <-
  protein_data %>%
  filter(str_detect(name, regex("keratin", ignore_case = TRUE))) %>%
  pull(entry)

cho_sequences <-
  dir_ls("data/sequence_databases/", type = "file") %>%
  readAAStringSet() %>%
  unique() %>%
  as.character() %>%
  set_names(function(x) str_match(x, "\\|([:alnum:]+)\\|")[,2])
```

Define several character vectors containing sequences of all unique peptides in the database (`unique_peptides`), all peptides derived from keratins (`keratin_peptides`), and all peptides associated with non-HCPs (`non_hcp_peptides`).

```
unique_peptides <-
  peptide_data_raw %>%
  pull(sequence_unformatted) %>%
  unique() %>%
  magrittr::extract(
    str_glue("[KR]{.}|(^{.})") %>%
    map(
      str_which,
      string = cho_sequences
    ) %>%
    map_lgl(~length(.x) == 1)
```

```

)

keratin_peptides <-
  peptide_data_raw %>%
  pull(sequence_unformatted) %>%
  unique() %>%
  magrittr::extract(
    str_glue("[KR]{.}|(^{.})") %>%
    map(
      str_which,
      string = cho_sequences[keratins]
    ) %>%
    map_lgl(~length(.x) > 0)
  )

non_hcp_peptides <-
  peptide_data_raw %>%
  pull(sequence_unformatted) %>%
  unique() %>%
  magrittr::extract(
    str_glue("[KR]{.}|(^{.})") %>%
    map(
      str_which,
      string = cho_sequences[non_hcps_database]
    ) %>%
    map_lgl(~length(.x) > 0)
  ) %>%
  c("TLDNDIMLIK", "TIAAN", "NYLNWYQQK")

```

recode\_dp\_names() converts drug product names in the datasets to the final printed form (*i.e.*, uppercase with a registered trademark sign).

```

recode_dp_names <- function(df, drug_col = drug) {
  dp_mapping <- c(
    "Avastin@" = "avastin",
    "MabThera@" = "rituximab",
    "Benepali@" = "benepali",
    "Enbrel@ EU" = "enbrel_eu",
    "Enbrel@ US" = "enbrel_us"
  )

  suppressWarnings(
    df %>%

```

```

mutate(
  {{drug_col}} :=
    factor({{drug_col}}) %>%
    fct_recode(!!!dp_mapping) %>%
    fct_relevel(names(dp_mapping))
)
}

```

In order to filter *in silico* peptides, determine the 5th percentile of MS1 correlation values (`insilico_limits$q5_ms1cor`) as well as the 2.5th and 97.5th percentile of PPM values (`insilico_limits$q2.5_ppm` and `insilico_limits$q97.5_ppm`, respectively) for peptides detected *via* fragment ion spectra. Subsequently, remove all putative *in silico* peptides from the dataset that do not fall within these percentiles. This operation yields the data frame `peptide_data`, which represents the final dataset of all detected peptides.

```

insilico_limits <-
  peptide_data_raw %>%
  filter(!in_silico) %>%
  summarise(
    q5_ms1cor = quantile(ms1_correlation, .05),
    q2.5_ppm = quantile(ppm, .025),
    q97.5_ppm = quantile(ppm, .975)
  ) %>%
  as.list()

peptide_data <-
  peptide_data_raw %>%
  filter(
    !in_silico |
    (
      in_silico &
      ms1_correlation >= insilico_limits$q5_ms1cor &
      ppm %>% between(
        insilico_limits$q2.5_ppm,
        insilico_limits$q97.5_ppm
      )
    )
  ) %>%
  recode_dp_names() %>%
  mutate(
    protein =
      str_replace_all(
        protein,

```

```

    c("ProteinA" = "Protein A",
      "Avastin" = "Bevacizumab",
      "G3HUC0" = "Trypsin",
      "G3HUA1" = "Trypsin",
      "G3IMG2" = "Bevacizumab")
  )
)

```

`peptide_abundances` collects the following properties for each peptide on the level of replicates: Total XIC area, credibility (*i.e.*, detection *via* MS/MS or *in silico*), relative abundance, and type (HCP, keratin, or other). Only peptides with at least five residues will be considered for calculating these properties.

```

peptide_abundances <-
  peptide_data %>%
  filter(peptide_length >= 5) %>%
  group_by(drug, sample, sequence_unformatted) %>%
  summarise(
    xic = sum(xic_area_summed, na.rm = TRUE),
    credibility = !all(in_silico)
  ) %>%
  mutate(
    rel_abundance = xic / max(xic) * 100,
    credibility = case_when(
      credibility ~ "MS/MS",
      TRUE ~ "In silico"
    ) %>%
    as.ordered()
  ) %>%
  ungroup() %>%
  rename(sequence = sequence_unformatted) %>%
  mutate(
    type = case_when(
      sequence %in% keratin_peptides ~ "keratins",
      sequence %in% non_hcp_peptides ~ "other",
      TRUE ~ "HCPs"
    ) %>%
    as_factor() %>%
    fct_relevel("keratins", "HCPs")
  )

```

Below, the three properties credibility, relative abundance, and type will be aggregated at the fraction or workflow level. To this end, the function `aggregate_properties()` provides a common sequence of transformations.

```

aggregate_properties <- function(df, ...) {
  df %>%
  group_by(...) %>%
  summarise(
    credibility = max(credibility),
    rel_abundance = mean(rel_abundance),
    type = first(type)
  ) %>%
  mutate(rel_abundance = rel_abundance / max(rel_abundance) * 100) %>%
  ungroup()
}

```

peptide\_abundances\_fractions aggregates the properties of each peptide at the fraction level.

```

peptide_abundances_fractions <-
  peptide_abundances %>%
  mutate(sample = str_sub(sample, 1, 1)) %>%
  aggregate_properties(drug, sample, sequence)

```

Likewise, peptide\_abundances\_workflow aggregates these properties at the workflow level.

```

peptide_abundances_workflow <-
  peptide_abundances %>%
  mutate(sample = case_when(
    str_starts(sample, "D") ~ "D",
    TRUE ~ "F+W"
  )) %>%
  aggregate_properties(drug, sample, sequence)

```

Assemble data on identified HCPs, which will require two auxiliary functions. First, add\_peptide\_rank() ranks each peptide according to its abundance (that is, total XIC area of all observed charge states).

```

add_peptide_rank <- function(df) {
  df_rank <-
  df %>%
  group_by(
    drug, protein, sample, sequence_unformatted, mod_summary
  ) %>%
  summarise(xic = sum(xic_area_summed, na.rm = TRUE)) %>%
  group_by(drug, protein, sample) %>%
  mutate(peptide_rank = row_number(desc(xic))) %>%

```



```

ungroup() %>%
select(-xic)

df %>%
left_join(
  df_rank,
  by = c("drug", "sequence_unformatted",
         "mod_summary", "protein", "sample")
)
}

```

Second, `add_n_unique_peptides()` determines the number of unique peptides observed at the MS/MS level for each HCP.

```

add_n_unique_peptides <- function(df) {
  n_unique_peptides <-
  df %>%
  filter(!in_silico, sequence_unformatted %in% unique_peptides) %>%
  group_by(drug, sample, protein) %>%
  summarise(n_peptides = n_distinct(sequence_unformatted)) %>%
  ungroup()

  df %>%
  left_join(n_unique_peptides, by = c("drug", "sample", "protein"))
}

```

`hcp_abundances` collects the following data for each identified protein on the level of replicates: Total XIC area, credibility, relative abundance, and type. Only the three highest-ranking peptides with at least five residues will be considered for calculating these properties.

```

hcp_abundances <-
peptide_data %>%
filter(peptide_length >= 5) %>%
add_peptide_rank() %>%
add_n_unique_peptides() %>%
mutate(
  credibility = case_when(
    !in_silico & n_peptides >= 3 ~ "MS/MS, 3 unique peptides",
    !in_silico & n_peptides == 2 ~ "MS/MS, 2 unique peptides",
    !in_silico & n_peptides == 1 ~ "MS/MS, 1 unique peptide",
    !in_silico ~ "MS/MS",
    TRUE ~ "In silico"
  ) %>%

```

```

    as.ordered()
  ) %>%
  group_by(drug, sample, protein) %>%
  summarise(
    xic = sum(xic_area_summed[peptide_rank <= 3], na.rm = TRUE) /
      n_distinct(peptide_rank[peptide_rank <= 3]),
    credibility = max(credibility)
  ) %>%
  mutate(rel_abundance = xic / max(xic) * 100) %>%
  ungroup() %>%
  mutate(
    type = case_when(
      protein %in% keratins ~ "keratins",
      protein %in% non_hcps ~ "other",
      TRUE ~ "HCPs"
    ) %>%
    as_factor() %>%
    fct_relevel("keratins", "HCPs")
  )

```

As above, aggregate HCP abundances on the level of fractions ...

```

hcp_abundances_fractions <-
  hcp_abundances %>%
  mutate(sample = str_sub(sample, 1, 1)) %>%
  aggregate_properties(drug, sample, protein)

```

... and workflows.

```

hcp_abundances_workflow <-
  hcp_abundances %>%
  mutate(sample = case_when(
    str_starts(sample, "D") ~ "D",
    TRUE ~ "F+W"
  )) %>%
  aggregate_properties(drug, sample, protein)

```

In addition, protein abundances on the fraction level will be analyzed in a “compressed” form, where the abundances of all HCPs will be accumulated.

```

hcp_abundances_fractions_compressed <-
  hcp_abundances_fractions %>%
  filter(type == "other") %>%
  bind_rows(

```

```

hcp_abundances_fractions %>%
  group_by(drug, sample, type) %>%
  summarise(
    credibility = max(credibility),
    rel_abundance = sum(rel_abundance)
  ) %>%
  mutate(protein = as.character(type)) %>%
  filter(protein != "other")
) %>%
group_by(drug, sample) %>%
mutate(rel_abundance = rel_abundance / max(rel_abundance) * 100) %>%
ungroup()

```

## Jaccard distance calculation

Define several functions that allow to compare HCP profiles by means of their Jaccard distance. `jaccard_matrix()` assembles a matrix with Jaccard indices. It requires a data frame with one column containing sample names (`sample_col`) and one column listing members of this sample (`member_col`, *e.g.*, protein identifiers).

```

jaccard_matrix <- function(df,
                           sample_col = sample,
                           member_col = member,
                           as_matrix = TRUE) {
  result <-
    df %>%
    pull({{sample_col}}) %>%
    unique() %>%
    list(x = ., y = .) %>%
    cross_df() %>%
    pmap_dfr(
      function(x, y) {
        ids_x <-
          df %>%
            filter({{sample_col}} == {{x}}) %>%
            pull({{member_col}})
        ids_y <-
          df %>%
            filter({{sample_col}} == {{y}}) %>%
            pull({{member_col}})
        tibble(
          x = x,
          y = y,

```

```

        members_x = list(ids_x),
        members_y = list(ids_y),
        size_intersection = length(intersect(ids_x, ids_y)),
        size_union = length(union(ids_x, ids_y)),
        index = size_intersection / size_union
    )
}
)

if (as_matrix) {
  result %>%
    select(x, y, index) %>%
    pivot_wider(names_from = y, values_from = index) %>%
    column_to_rownames("x") %>%
    as.matrix()
} else {
  result
}
}

```

`reorder_hclust_leaves()` and `reorder_hclust()` are auxiliary functions that reorder dendrograms according to a string vector.

```

reorder_hclust_leaves <- function(dend, mat, ...) {
  wts <-
    c(...) %>%
    map(~str_which(rownames(mat), .)) %>%
    simplify() %>%
    order()
  reorder(dend, wts, min)
}

reorder_hclust <- function(mat, ...) {
  mat %>%
    dist() %>%
    hclust() %>%
    as.dendrogram() %>%
    reorder_hclust_leaves(mat, ...) %>%
    as.hclust()
}

```

`jaccard_heatmap()` draws a heatmap representing a matrix of Jaccard indices. Cells of this heatmap may have one of three `sizes`, in order to generate heatmaps with equal areas for drugs, fractions, and replicates.

```

jaccard_heatmap <- function(mat, size = c("small", "medium", "large")) {
  size <- match.arg(size)
  cell_size <- 7.79 *
    case_when(
      size == "small" ~ 1,
      size == "medium" ~ 3,
      TRUE ~ 6
    )

  if (size == "small")
    display_numbers <- FALSE
  else
    display_numbers <-
      (mat * 100) %>%
      replace(near(., 100), NA) %>%
      format(digits = 0) %>%
      str_replace("NA", "") %>%
      str_trim() %>%
      matrix(nrow = nrow(mat))

  dend <-
    mat %>%
    reorder_hclust("Avastin", "MabThera",
                  "Benepali", "Enbrel EU", "Enbrel US")

  opts <-
    list(
      border_color = NA,
      breaks = seq(0, 1, length.out = 101),
      cellheight = cell_size,
      cellwidth = cell_size,
      cluster_cols = dend,
      cluster_rows = dend,
      color = rev(inferno(100)),
      display_numbers = display_numbers,
      fontsize = 8,
      legend = TRUE,
      number_format = "%.f"
    )

  p <- exec(pheatmap, mat, !!!opts)
  set_last_plot(p)
  invisible(p)
}

```

```
}
```

## Figure 1: Workflow

This figure was drawn in Inkscape.

## Figure 2a: Peptide count

`count_peptides()` reports the number of peptides in a dataset by drug, sample, type, credibility, and uniqueness.

```
count_peptides <- function(df) {  
  df %>%  
    mutate(  
      uniqueness = case_when(  
        sequence %in% unique_peptides ~ "unique",  
        TRUE ~ "shared"  
      ),  
    ) %>%  
    group_by(drug, sample) %>%  
    count(type, credibility, uniqueness) %>%  
    ungroup() %>%  
    complete(  
      drug, sample, type, credibility, uniqueness,  
      fill = list(n = 0)  
    )  
}
```

Draw a bar chart showing the number of peptides for each drug and color the bars by credibility and uniqueness. Use selected colors (that is, numbers 2, 5, 4, and 3) from the Okabe-Ito color scale<sup>7</sup>. In addition, show gray bars in the background indicating the total number of peptides.

```
draw_peptide_count <- function(df) {  
  total_abundances <-  
    df %>%  
    group_by(drug, sample) %>%  
    summarise(n = sum(n))  
  
  df %>%  
    filter(type == "HCPs") %>%  
    unite(credibility, uniqueness, col = "rel_uni") %>%  
    ggplot(aes(sample, n)) +  
    geom_col(data = total_abundances, fill = "grey92") +
```

```

geom_col(aes(fill = rel_uni)) +
scale_x_discrete(name = "") +
scale_y_continuous(
  name = "Number of identifications",
  expand = expansion(mult = c(0, .05))
) +
scale_fill_manual(
  name = "credibility",
  values = c("#e69f00", "#f0e442", "#009e73", "#56b4e9")
) +
facet_wrap(vars(drug), nrow = 1, strip.position = "bottom") +
theme_bw() +
theme(
  panel.border = element_blank(),
  panel.grid.major.x = element_blank(),
  panel.grid.minor = element_blank(),
  strip.background = element_rect(color = NA)
)
}

peptide_abundances_workflow %>%
  count_peptides() %>%
  draw_peptide_count()

```

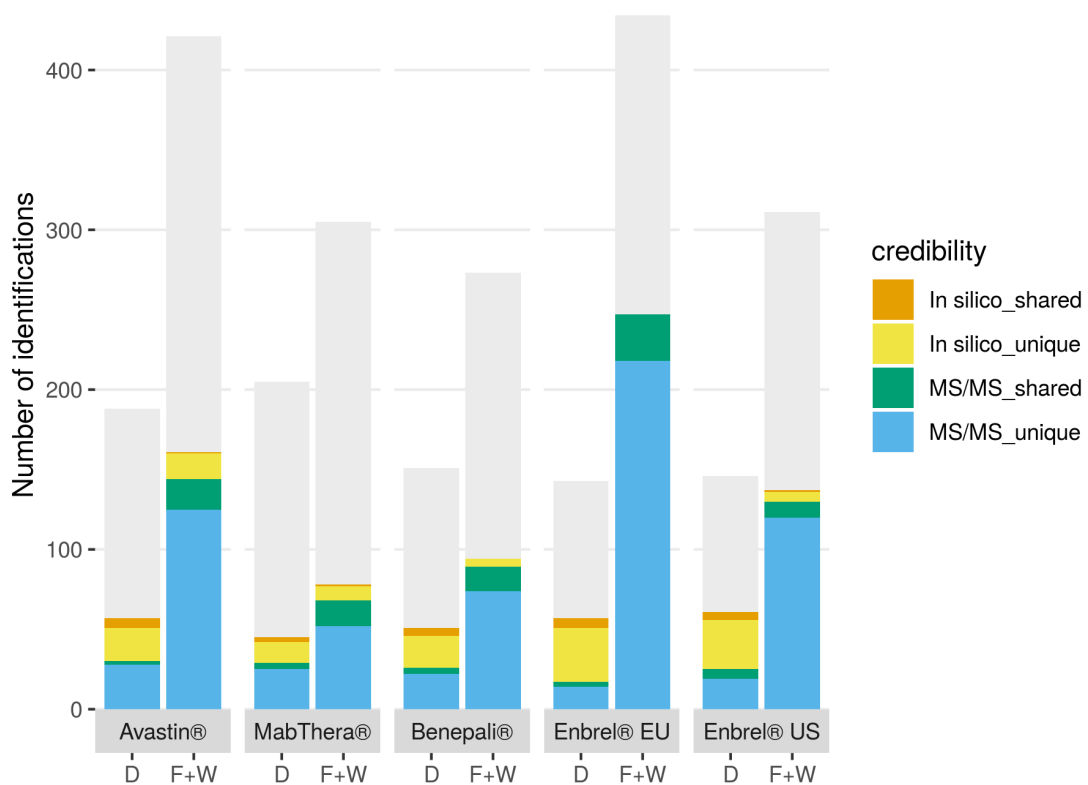

```
ggsave_default("figure_2a", width = 15.4, height = 12)
```

## Figure 2b: HCP count

`count_hcps()` reports the number of proteins in a dataset by drug, sample, type, and credibility.

```
count_hcps <- function(df) {
  df %>%
    group_by(drug, sample, type, credibility) %>%
    summarise(n = n_distinct(protein)) %>%
    ungroup() %>%
    complete(drug, sample, type, credibility, fill = list(n = 0))
}
```

Draw a bar chart showing the number of HCPs for each drug and color the bars by credibility. In addition, show gray bars in the background indicating the total number of proteins.



```

draw_hcp_count <- function(df) {
  total_abundances <-
    df %>%
      group_by(drug, sample) %>%
      summarise(n = sum(n))

  df %>%
    filter(type == "HCPs") %>%
    ggplot(aes(sample, n)) +
    geom_col(data = total_abundances, fill = "grey92") +
    geom_col(aes(fill = credibility)) +
    scale_x_discrete(name = "") +
    scale_y_continuous(
      name = "Number of identifications",
      expand = expansion(mult = c(0, .05))
    ) +
    scale_fill_manual(
      name = "credibility",
      values = color_scale_credibility_hcp,
      drop = FALSE,
    ) +
    facet_wrap(vars(drug), nrow = 1, strip.position = "bottom") +
    theme_bw() +
    theme(
      panel.border = element_blank(),
      panel.grid.major.x = element_blank(),
      panel.grid.minor = element_blank(),
      strip.background = element_rect(color = NA)
    )
}

hcp_abundances_workflow %>%
  count_hcps() %>%
  draw_hcp_count()

```

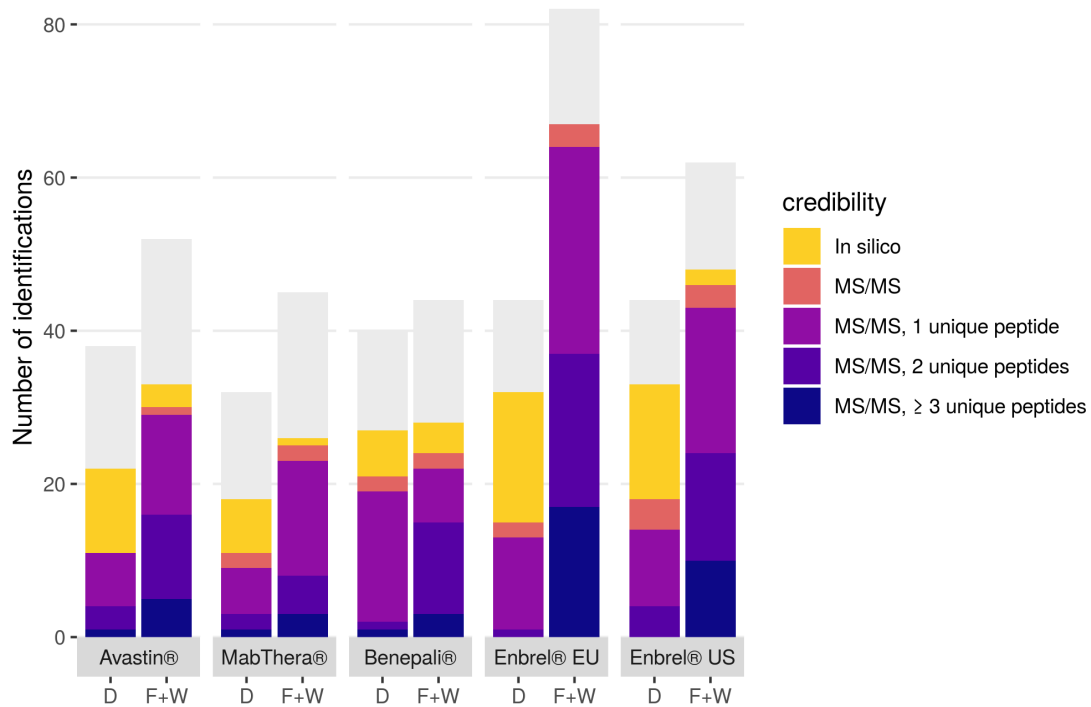

```
ggsave_default("figure_2b", width = 17, height = 12)
```

### Figure 3: Protein abundances

Draw a heatmap showing estimated protein abundances.

```
draw_compressed_heatmap <- function(df) {
  y_order <- c(non_hcps, "HCPs", "keratins")

  df %>%
    mutate(
      protein =
        protein %>%
        as_factor() %>%
        fct_relevel(y_order) %>%
        as.numeric()
    ) %>%
    ggplot(aes(sample, protein)) +
    geom_tile(aes(fill = rel_abundance)) +
    scale_x_discrete(name = "", expand = expansion()) +
```

```

scale_y_continuous(
  name = "",
  breaks = seq_along(y_order),
  labels = y_order,
  expand = expansion()
) +
scale_fill_viridis(
  name = "relative abundance (%)",
  direction = -1,
  option = "A",
) +
facet_grid(
  vars(type),
  vars(drug),
  scales = "free_y",
  space = "free_y",
  switch = "both"
) +
theme_bw() +
theme(
  axis.ticks.y.right = element_blank(),
  panel.border = element_blank(),
  panel.background = element_rect(fill = "#f2f2f2"),
  panel.grid = element_blank(),
  panel.spacing.x = unit(2, "mm"),
  strip.background = element_blank(),
  strip.placement = "outside",
  strip.switch.pad.wrap = unit(0, "mm"),
  strip.text.y = element_blank()
)
}

hcp_abundances_fractions_compressed %>%
draw_compressed_heatmap()

```

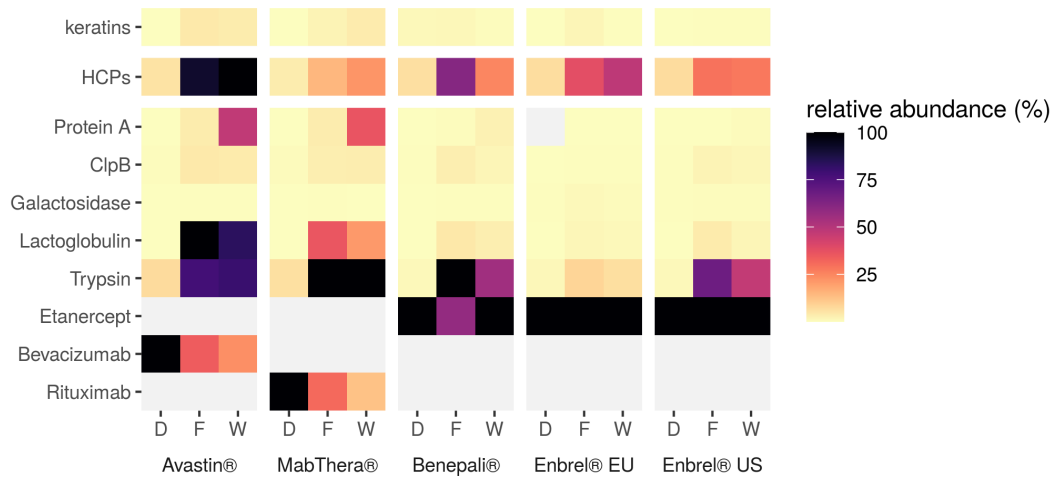

```
ggsave_default("figure_3", width = 17.9, height = 8.5)
```

## Figure 4: Repeatability

`get_repeatability()` collects Jaccard indices obtained by pairwise comparison of all replicates for a fraction of a drug.

```
get_repeatability <- function(df, member_col) {
  result <-
    df %>%
    mutate(fraction = str_sub(sample, 1, 1)) %>%
    expand(drug, fraction, credibility) %>%
    pmap_dfr(
      function(drug, fraction, credibility) {
        df <-
          df %>%
          filter(
            type == "HCPs",
            drug == {{drug}},
            sample %>% str_starts(fraction),
            credibility >= {{credibility}}
          ) %>%
          unite(drug, sample, col = "sample")

        if (nrow(df) == 0)
          return(tibble())

        df %>%
```

```

    jaccard_matrix(member_col = {{member_col}}) %>%
    magrittr::inset(lower.tri(., diag = TRUE), NA) %>%
    as_tibble(rownames = "sample_1") %>%
    pivot_longer(
      -sample_1,
      names_to = "sample_2",
      values_to = "jaccard_index"
    ) %>%
    drop_na(jaccard_index) %>%
    mutate(min_credibility = {{credibility}})
  }
)

result %>%
  complete(
    nesting(sample_1, sample_2),
    min_credibility,
    fill = list(jaccard_index = 0)
  ) %>%
  extract(
    sample_1,
    into = c("drug", "fraction"),
    regex = "(.+)_(.)",
    remove = FALSE
  )
}

hcp_repeatability <-
  hcp_abundances %>%
  get_repeatability(protein)

peptide_repeatability <-
  peptide_abundances %>%
  get_repeatability(sequence)

```

Draw a boxplot summarizing these Jaccard indices. Use ColorBrewer's Dark2 color scheme for fractions<sup>8</sup>.

```

bind_rows(
  "HCPs" = hcp_repeatability,
  "Peptides" = peptide_repeatability,
  .id = "level"
) %>%

```

```

mutate(
  min_credibility = ordered(min_credibility) %>% fct_rev(),
  fraction = case_when(
    fraction == "F" ~ "flow-through",
    TRUE          ~ "wash"
  )
) %>%
recode_dp_names() %>%
filter(
  !str_detect(sample_1, "_D"),
  min_credibility >= "MS/MS, 2 unique peptides"
) %>%
ggplot(
  aes(
    fct_recode(
      min_credibility,
      "MS/MS\n(1 unique\npeptide)" = "MS/MS, 1 unique peptide",
      "MS/MS\n( 2 unique\npeptides)" = "MS/MS, 2 unique peptides"
    ),
    jaccard_index
  )
) +
geom_boxplot(
  color = "gray50",
  outlier.alpha = 0
) +
geom_point(
  aes(color = fraction, shape = drug, group = fraction),
  position = position_jitterdodge(jitter.width = 1, seed = 42),
  alpha = .5
) +
scale_y_continuous(
  name = "Jaccard index",
  limits = c(0, 1),
  breaks = c(0, .5, 1),
  expand = c(0, 0)
) +
scale_color_brewer(
  palette = "Dark2",
  guide = guide_legend(override.aes = list(shape = 15, size = 6))
) +
scale_shape_manual(
  name = "drug product",

```

```

values = c(16, 17, 0, 1, 2),
guide = guide_legend(override.aes = list(alpha = 1))
) +
facet_wrap(vars(level), scales = "free_x") +
xlab("Minimum credibility") +
theme_bw() +
theme(
  panel.grid.major.x = element_blank(),
  strip.background = element_blank(),
  strip.text = element_text(face = "bold")
)

```

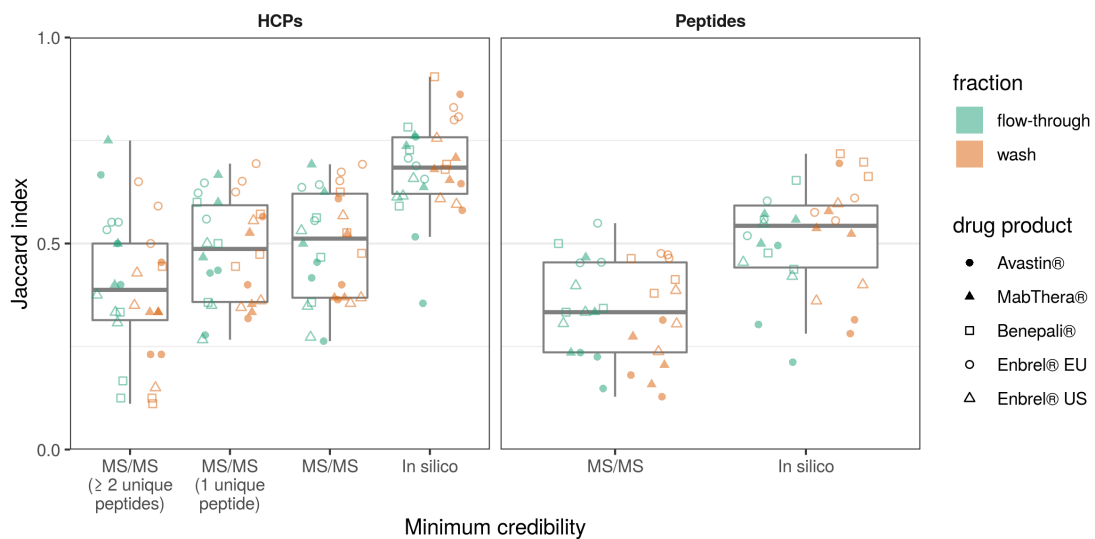

```

ggsave_default("figure_4", width = 20, height = 10)

```

## Figure 5: HCP Jaccard plots

Draw heatmaps for comparison of HCP profiles on the level of drugs, ...

```

jaccard_data_hcp <-
  hcp_abundances %>%
  filter(
    type == "HCPs",
    !str_starts(sample, "D"),
  )
jaccard_data_hcp %>%

```

```
jaccard_matrix(sample_col = drug, member_col = protein) %>%
jaccard_heatmap(size = "large")
```

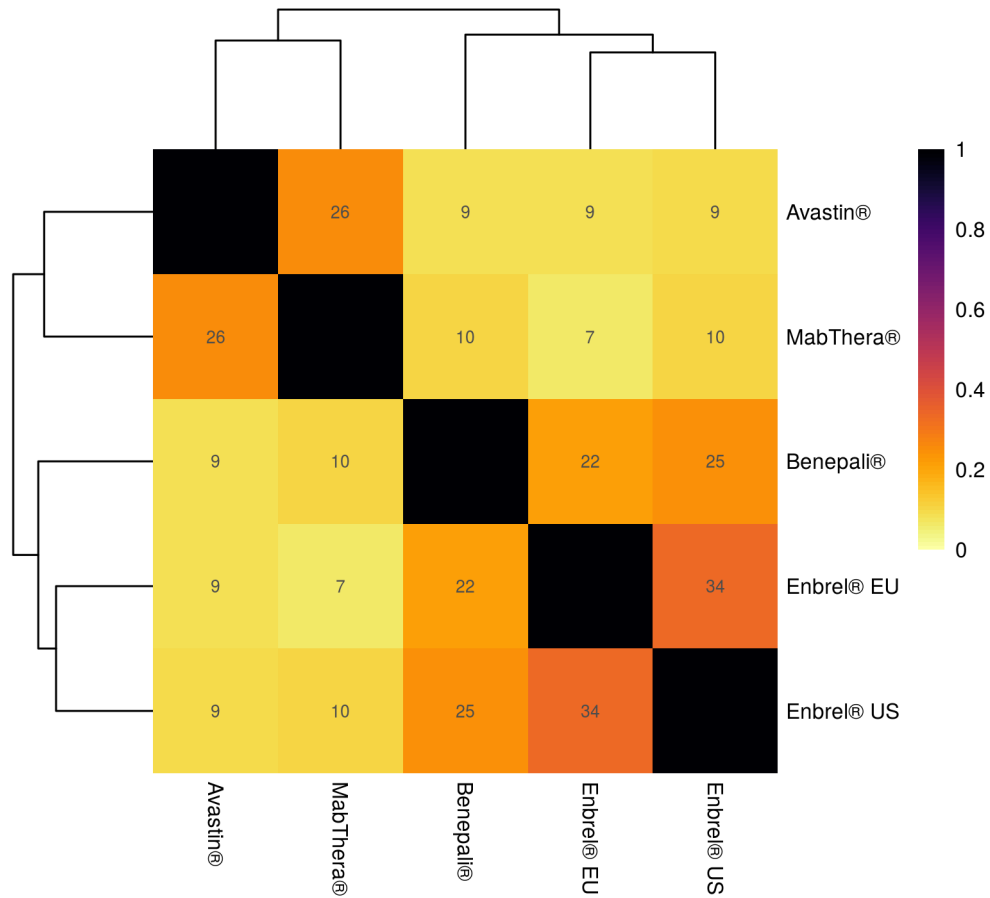

```
ggsave_default("figure_5a", width = 13.6, height = 12.4)
```

... fractions, ...

```
jaccard_data_hcp %>%
mutate(sample = str_c(drug, str_sub(sample, 1, 1), sep = "_")) %>%
jaccard_matrix(member_col = protein) %>%
jaccard_heatmap(size = "medium")
```



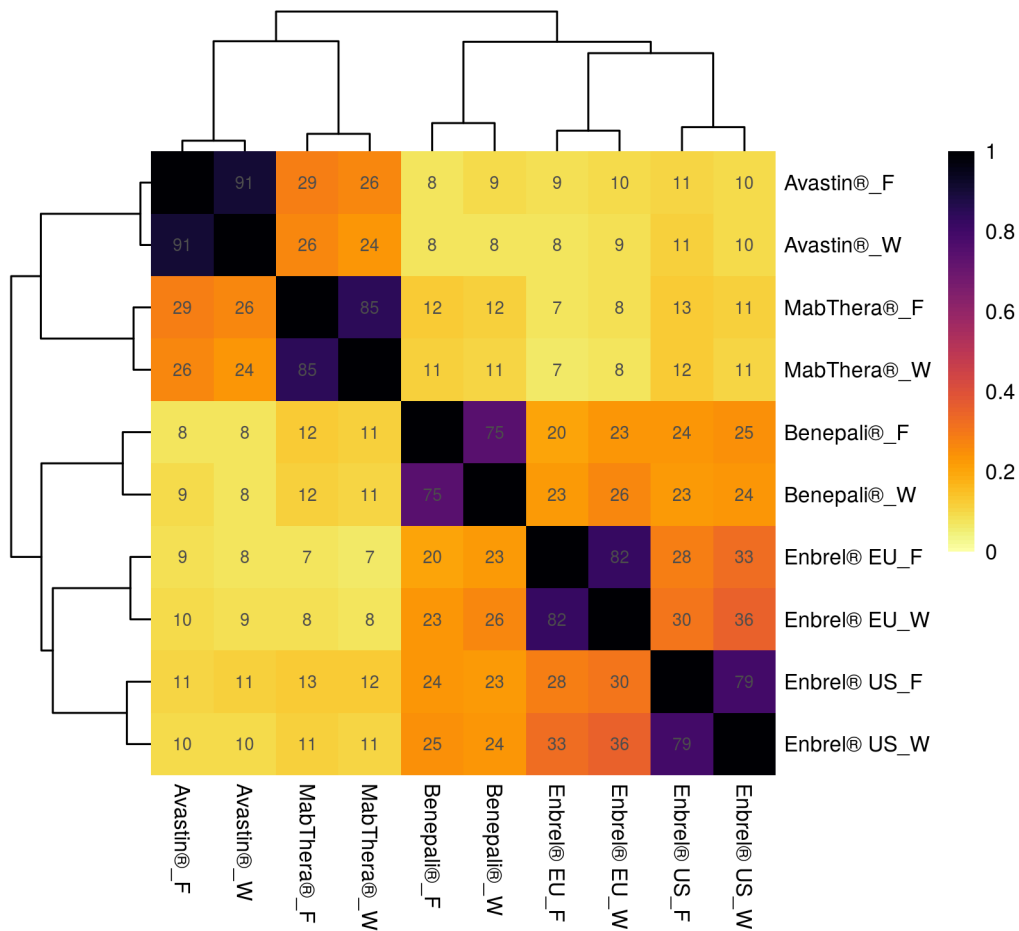

```
ggsave_default("figure_5b", width = 13.6, height = 12.4)
```

... and replicates.

```
jaccard_data_hcp %>%
  unite(drug, sample, col = "sample") %>%
  jaccard_matrix(member_col = protein) %>%
  jaccard_heatmap(size = "small")
```

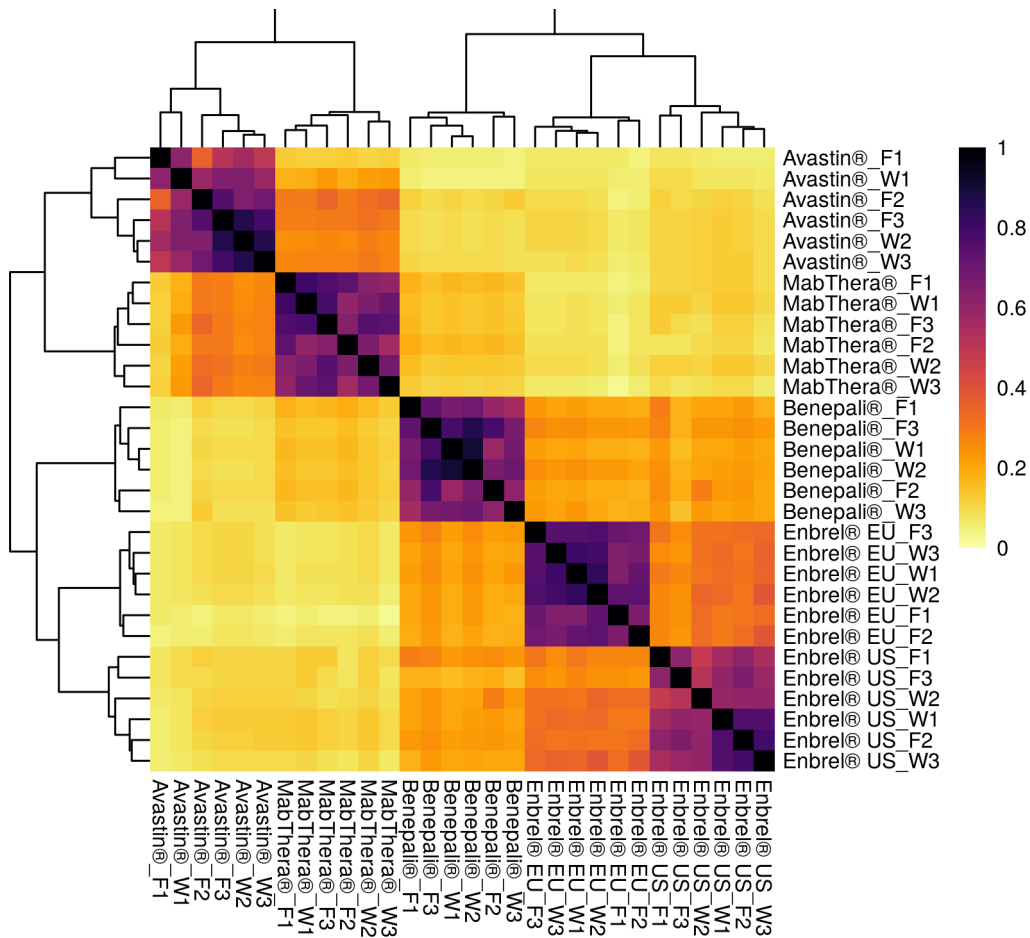

```
ggsave_default("figure_5c", width = 13.6, height = 12.4)
```

## Other analyses

(Note: Numbers in the tables below are cited in the *Results and Discussion* section of the manuscript.)

- How many unique peptides were detected in the direct workflow by MS/MS? (subsection *Direct HCP identification ...*, second paragraph)

```
peptide_abundances_workflow %>%
  count_peptides() %>%
  filter(
    sample == "D",
    credibility == "MS/MS",
    uniqueness == "unique"
```

```

) %>%
group_by(drug, sample) %>%
summarise(n = sum(n)) %>%
arrange(sample, n) %>%
knitr::kable()

```

| drug       | sample | n   |
|------------|--------|-----|
| Enbrel® EU | D      | 45  |
| Enbrel® US | D      | 53  |
| Benepali®  | D      | 56  |
| Avastin®   | D      | 80  |
| MabThera®  | D      | 103 |

- What is the corresponding number of HCPs with at least one unique peptide? (*ibidem*)

```

hcp_abundances_workflow %>%
count_hcps() %>%
filter(
  sample == "D",
  credibility %>% str_starts("MS/MS, ")
) %>%
group_by(drug, sample) %>%
summarise(n = sum(n)) %>%
arrange(n) %>%
knitr::kable()

```

| drug       | sample | n  |
|------------|--------|----|
| MabThera®  | D      | 16 |
| Enbrel® EU | D      | 17 |
| Avastin®   | D      | 18 |
| Enbrel® US | D      | 18 |
| Benepali®  | D      | 23 |

- How many unique HCP-derived peptides were detected by MS/MS? (*ibidem*)

```

peptide_abundances_workflow %>%
count_peptides() %>%
filter(
  sample == "D",

```

```

type == "HCPs",
credibility == "MS/MS",
uniqueness == "unique"
) %>%
group_by(drug, sample) %>%
summarise(n = sum(n)) %>%
arrange(n) %>%
knitr::kable()

```

| drug       | sample | n  |
|------------|--------|----|
| Enbrel® EU | D      | 14 |
| Enbrel® US | D      | 19 |
| Benepali®  | D      | 22 |
| MabThera®  | D      | 25 |
| Avastin®   | D      | 28 |

- What is the corresponding number of HCPs with at least one unique peptide? (*ibidem*)

```

hcp_abundances_workflow %>%
count_hcps() %>%
filter(
sample == "D",
type == "HCPs",
credibility %>% str_starts("MS/MS, ")
) %>%
group_by(drug, sample) %>%
summarise(n = sum(n)) %>%
arrange(n) %>%
knitr::kable()

```

| drug       | sample | n  |
|------------|--------|----|
| MabThera®  | D      | 9  |
| Avastin®   | D      | 11 |
| Enbrel® EU | D      | 13 |
| Enbrel® US | D      | 14 |
| Benepali®  | D      | 19 |

- How many unique HCP-derived peptides were detected in the direct workflow by MS/MS? (subsection *HCP identification upon drug molecule depletion*, second

paragraph)

```
peptide_abundances_workflow %>%
  count_peptides() %>%
  filter(
    sample == "F+W",
    type == "HCPs",
    credibility == "MS/MS",
    uniqueness == "unique"
  ) %>%
  group_by(drug, sample) %>%
  summarise(n = sum(n)) %>%
  arrange(n) %>%
  knitr::kable()
```

| drug       | sample | n   |
|------------|--------|-----|
| MabThera®  | F+W    | 52  |
| Benepali®  | F+W    | 74  |
| Enbrel® US | F+W    | 120 |
| Avastin®   | F+W    | 125 |
| Enbrel® EU | F+W    | 218 |

- What is the corresponding number of HCPs with at least one unique peptide? (*ibidem*)

```
hcp_abundances_workflow %>%
  count_hcps() %>%
  filter(
    sample == "F+W",
    type == "HCPs",
    credibility %>% str_starts("MS/MS, ")
  ) %>%
  group_by(drug, sample) %>%
  summarise(n = sum(n)) %>%
  arrange(n) %>%
  knitr::kable()
```

| drug      | sample | n  |
|-----------|--------|----|
| Benepali® | F+W    | 22 |
| MabThera® | F+W    | 23 |
| Avastin®  | F+W    | 29 |

| drug       | sample | n  |
|------------|--------|----|
| Enbrel® US | F+W    | 43 |
| Enbrel® EU | F+W    | 64 |

- How many shared peptides were considered by the probabilistic algorithm? (subsection *Improved HCP identification ...*, second paragraph)

```
peptide_abundances_workflow %>%
  count_peptides() %>%
  filter(
    sample == "F+W",
    type == "HCPs",
    credibility == "MS/MS",
    uniqueness == "shared"
  ) %>%
  group_by(drug, sample) %>%
  arrange(n) %>%
  knitr::kable()
```

| drug       | sample | type | credibility | uniqueness | n  |
|------------|--------|------|-------------|------------|----|
| Enbrel® US | F+W    | HCPs | MS/MS       | shared     | 10 |
| Benepali®  | F+W    | HCPs | MS/MS       | shared     | 15 |
| MabThera®  | F+W    | HCPs | MS/MS       | shared     | 16 |
| Avastin®   | F+W    | HCPs | MS/MS       | shared     | 19 |
| Enbrel® EU | F+W    | HCPs | MS/MS       | shared     | 29 |

- How many HCPs were additionally identified by the probabilistic algorithm? (*ibidem*)

```
hcp_abundances_workflow %>%
  count_hcps() %>%
  filter(
    sample == "F+W",
    type == "HCPs",
    credibility == "MS/MS"
  ) %>%
  arrange(sample, credibility, n) %>%
  knitr::kable()
```

| drug       | sample | type | credibility | n |
|------------|--------|------|-------------|---|
| Avastin®   | F+W    | HCPs | MS/MS       | 1 |
| MabThera®  | F+W    | HCPs | MS/MS       | 2 |
| Benepali®  | F+W    | HCPs | MS/MS       | 2 |
| Enbrel® EU | F+W    | HCPs | MS/MS       | 3 |
| Enbrel® US | F+W    | HCPs | MS/MS       | 3 |

- How many *in silico* peptides were detected? (third paragraph)

```
peptide_abundances_workflow %>%
  count_peptides() %>%
  filter(
    sample == "F+W",
    type == "HCPs",
    credibility == "In silico"
  ) %>%
  group_by(drug, sample) %>%
  summarise(n = sum(n)) %>%
  arrange(sample, n) %>%
  knitr::kable()
```

| drug       | sample | n  |
|------------|--------|----|
| Enbrel® EU | F+W    | 0  |
| Benepali®  | F+W    | 5  |
| Enbrel® US | F+W    | 7  |
| MabThera®  | F+W    | 10 |
| Avastin®   | F+W    | 17 |

- How many HCPs were additionally identified by these *in silico* peptides? (*ibidem*)

```
hcp_abundances_workflow %>%
  count_hcps() %>%
  filter(
    sample == "F+W",
    type == "HCPs",
    credibility == "In silico"
  ) %>%
  arrange(sample, n) %>%
  knitr::kable()
```

| drug       | sample | type | credibility | n |
|------------|--------|------|-------------|---|
| Enbrel® EU | F+W    | HCPs | In silico   | 0 |
| MabThera®  | F+W    | HCPs | In silico   | 1 |
| Enbrel® US | F+W    | HCPs | In silico   | 2 |
| Avastin®   | F+W    | HCPs | In silico   | 3 |
| Benepali®  | F+W    | HCPs | In silico   | 4 |

- What is the total number of HCPs identified in this study? (subsection *Comparative analysis of HCP profiles*, first paragraph)

```
hcp_abundances %>%
  filter(
    type == "HCPs",
    !str_starts(sample, "D")
  ) %>%
  pull(protein) %>%
  n_distinct()
#> [1] 127
```

- What is the total number of corresponding peptides? (*ibidem*)

```
peptide_abundances %>%
  filter(
    type == "HCPs",
    !str_starts(sample, "D")
  ) %>%
  pull(sequence) %>%
  n_distinct()
#> [1] 537
```

- Which HCPs have been detected in all drug products?

```
protein_data %>%
  inner_join(
    hcp_abundances_workflow %>%
      filter(sample == "F+W", type == "HCPs") %>%
      group_by(protein) %>%
      summarise(n_drugs = n_distinct(drug)) %>%
      filter(n_drugs == 5),
    by = c(entry = "protein")
  ) %>%
  select(entry, name) %>%
  knitr::kable()
```



| entry  | name              |
|--------|-------------------|
| G3HAC6 | Titin             |
| G3HG75 | Nestin            |
| G3HL18 | Anionic trypsin-2 |

- By how much do median Jaccard indices increase if peptide and HCP identifications with less credibility are included for assessing repeatability? (third paragraph)

```

hcp_repeatability %>%
  filter(fraction != "D") %>%
  group_by(min_credibility) %>%
  summarise(
    median = median(jaccard_index),
    IQR = IQR(jaccard_index)
  ) %>%
  head(4) %>%
  knitr::kable(digits = 2)

```

| min_credibility          | median | IQR  |
|--------------------------|--------|------|
| In silico                | 0.68   | 0.14 |
| MS/MS                    | 0.51   | 0.25 |
| MS/MS, 1 unique peptide  | 0.49   | 0.23 |
| MS/MS, 2 unique peptides | 0.39   | 0.19 |

## Code for supporting figures

### Figure S1: Retention time stability

Draw a histogram that summarizes relative standard deviations of peptide retention times.

```
peptide_data %>%
  group_by(sequence_unformatted, mod_names) %>%
  summarise(sd = sd(obs_time_var_min) / mean(obs_time_var_min) * 100) %>%
  ungroup() %>%
  filter(!is.na(sd)) %>%
  mutate(sd = pmin(sd, 20)) %>%
  ggplot(aes(sd)) +
  geom_histogram(binwidth = 1) +
  scale_x_continuous(
    name = "Relative standard deviation\nof retention time (%)",
    labels = function(x) {
      x[length(x)] <- str_glue("{x[length(x)]} or higher")
      x
    }
  ) +
  ylab("Number of observations")
```

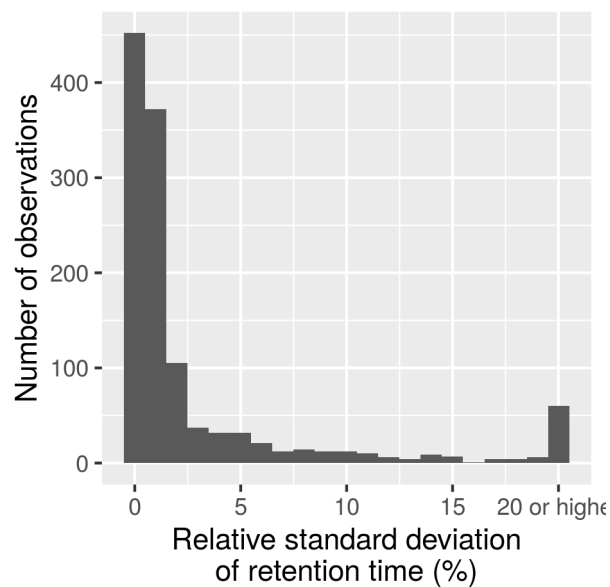

```
ggsave_default("figure_S1", width = 8, height = 8)
```

## Figure S2a: PPM distribution

Plot the distribution of deviations between theoretical and experimental peptide masses, as measured in PPM.

```
q2.5_label <- str_glue(
  "2.5th\n({format(insilico_limits$q2.5_ppm, digits = 3)} ppm)"
)
q97.5_label <- str_glue(
  "97.5th percentile\n({format(insilico_limits$q97.5_ppm, digits = 3)} ppm)"
)

peptide_data_raw %>%
  mutate(
    in_silico =
      case_when(
        in_silico ~ "In silico",
        TRUE      ~ "MS/MS"
      ) %>%
    as_factor() %>%
    fct_rev()
  ) %>%
  ggplot() +
  geom_histogram(aes(ppm), binwidth = 2, fill = "#d6604d") +
  geom_vline(
    xintercept = c(insilico_limits$q2.5_ppm, insilico_limits$q97.5_ppm),
    size = .25,
    linetype = "dashed"
  ) +
  geom_text(
    aes(x, y, label = label, hjust = hjust),
    data = tribble(
      ~x, ~y, ~label, ~in_silico, ~hjust,
      -8, 6850, q2.5_label, "MS/MS", 1,
      5, 6850, q97.5_label, "MS/MS", 0,
      -8, 2200, "2.5th", "In silico", 1,
      5, 2200, "97.5th percentile\nfor MS/MS", "In silico", 0
    ) %>%
    mutate(in_silico = factor(in_silico) %>% fct_rev()),
    vjust = 1
  ) +
  xlab("Mass deviation (ppm)") +
  ylab("Number of identifications") +
  facet_wrap(vars(in_silico), scales = "free_y")
```

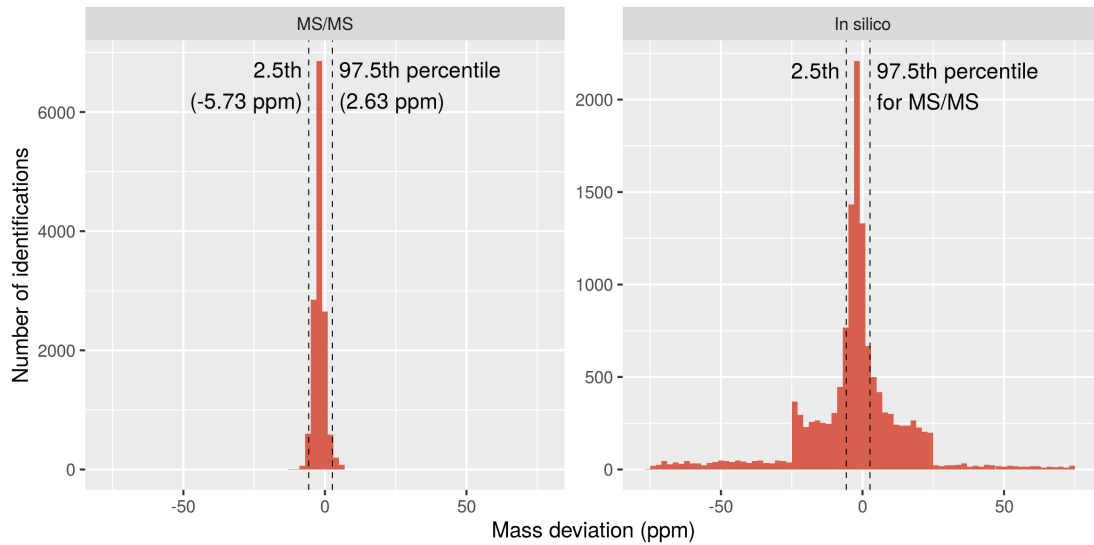

```
ggsave_default("figure_S2a", width = 20, height = 10)
```

### Figure S2b: MS1 correlation distribution

Plot the distribution of MS1 correlation coefficients for peptides detected on the MS/MS or full-scan MS level, respectively.

```
peptide_data_raw %>%
  mutate(
    in_silico =
      case_when(
        in_silico ~ "In silico",
        TRUE     ~ "MS/MS"
      ) %>%
    as_factor() %>%
    fct_rev()
  ) %>%
  ggplot() +
  geom_histogram(
    aes(ms1_correlation),
    binwidth = .02,
    fill = "#4393c3"
  ) +
  geom_vline(
    xintercept = insilico_limits$q5_ms1cor,
    size = .25,
    linetype = "dashed"
  )
```

```

) +
geom_text(
  aes(x, y, label = label),
  data = tibble(
    x = .77,
    y = c(4200, 1900),
    label = c(
      str_glue("5th percentile\n",
              "{format(insilico_limits$q5_ms1cor, digits = 3)}"),
      "5th percentile\nfor MS/MS"
    ),
    in_silico = factor(c("MS/MS", "In silico")) %>% fct_rev(),
    hjust = 1,
    vjust = 1
  ) +
facet_wrap(vars(in_silico), scales = "free_y") +
scale_x_continuous(
  name = "Pearson correlation coefficient",
  labels = function(x)
    case_when(
      near(x, 0) ~ "0 or lower",
      TRUE ~ as.character(x)
    )
) +
ylab("Number of identifications")

```

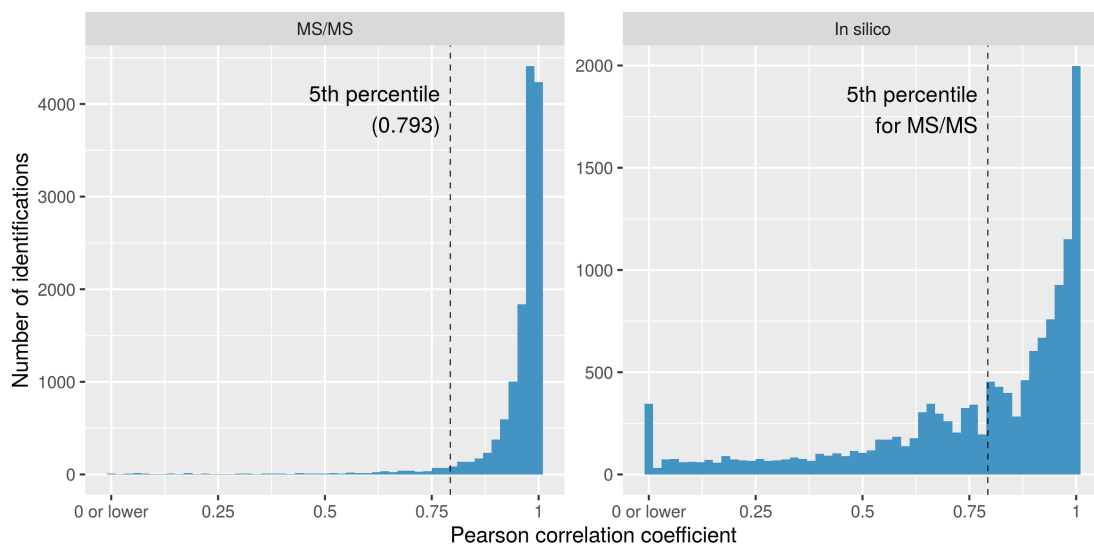

```
ggsave_default("figure_S2b", width = 20, height = 10)
```

### Figure S3a: Peptide credibility

Draw a heatmap displaying credibilities for all peptides.

```
draw_peptide_credibility <- function(df) {
  peptide_order <-
    df %>%
    group_by(sequence) %>%
    summarise(
      y_order = sum(credibility == "MS/MS"),
      type = first(type)
    ) %>%
    arrange(desc(type), desc(y_order))

  type_counts <-
    peptide_abundances %>%
    group_by(type) %>%
    summarise(n = n_distinct(sequence)) %>%
    deframe()

  df %>%
  mutate(
    sequence =
      sequence %>%
      as_factor() %>%
      fct_relevel(peptide_order %>% pull(sequence)),
    type = type %>% fct_relabel(~str_glue("{.} ({type_counts[.]})")
  ) %>%
  ggplot(aes(sample, sequence)) +
  geom_tile(aes(fill = credibility)) +
  scale_x_discrete(name = "", expand = expansion()) +
  scale_y_discrete(
    name = str_glue(
      "{n_distinct(df$sequence)} peptides"
    ),
  ),
  expand = expansion(),
  breaks = NULL,
  labels = NULL
) +
  scale_fill_manual(
    name = "credibility",
```

```

    values = c("#F0E442", "#56B4E9")
  ) +
  facet_grid(
    vars(type),
    vars(drug),
    scales = "free_y",
    space = "free_y",
    switch = "both"
  ) +
  theme_bw() +
  theme(
    panel.border = element_blank(),
    panel.background = element_rect(fill = "#f2f2f2"),
    panel.grid = element_blank(),
    panel.spacing.x = unit(2, "mm"),
    strip.background = element_blank(),
    strip.placement = "outside",
    strip.switch.pad.wrap = unit(0, "mm"),
    legend.position = "right"
  )
}

peptide_abundances_fractions %>%
  draw_peptide_credibility()

```

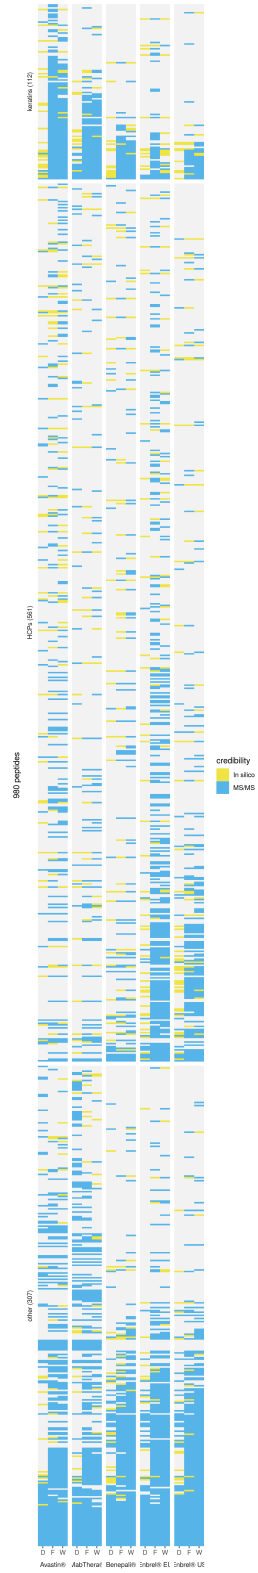



```
ggsave_default("figure_S3a", width = 12, height = 75)
```

### Figure S3b: HCP credibility

Draw a heatmap displaying credibilities for all proteins.

```
draw_hcp_credibility <- function(df) {
  true_hcps <-
    df %>%
    pull(protein) %>%
    unique() %>%
    setdiff(keratins) %>%
    setdiff(non_hcps) %>%
    sort()

  y_order <-
    c(non_hcps, true_hcps, keratins)

  df %>%
  mutate(
    protein =
      protein %>%
      as_factor() %>%
      fct_relevel(y_order) %>%
      as.numeric()
  ) %>%
  ggplot(aes(sample, protein)) +
  geom_tile(aes(fill = credibility)) +
  scale_x_discrete(name = "", expand = expansion()) +
  scale_y_continuous(
    name = "",
    breaks = seq_along(y_order),
    labels = y_order,
    expand = expansion(),
    sec.axis = dup_axis(
      name = "",
      labels =
        tibble(entry = y_order) %>%
        left_join(protein_data, by = "entry") %>%
        pull(name) %>%
        replace_na("") %>%
        str_sub(end = 80)
    )
  )
}
```

```

) +
scale_fill_manual(
  name = "credibility",
  values = color_scale_credibility_hcp,
  drop = FALSE,
) +
facet_grid(
  vars(type),
  vars(drug),
  scales = "free_y",
  space = "free_y",
  switch = "both"
) +
theme_bw() +
theme(
  axis.ticks.y.right = element_blank(),
  panel.border = element_blank(),
  panel.background = element_rect(fill = "#f2f2f2"),
  panel.grid = element_blank(),
  panel.spacing.x = unit(2, "mm"),
  strip.background = element_blank(),
  strip.placement = "outside",
  strip.switch.pad.wrap = unit(0, "mm"),
  legend.position = c(1.6, 0.015)
)
}

hcp_abundances_fractions %>%
  draw_hcp_credibility()

```

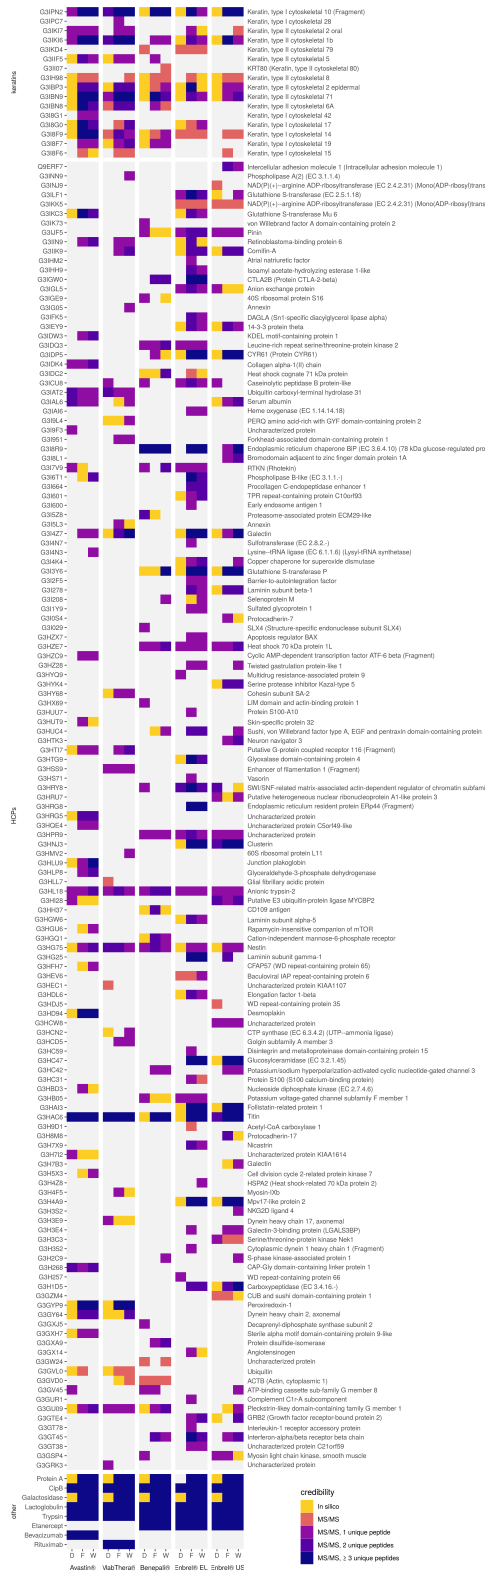

```
ggsave_default("figure_S3b", width = 24, height = 75)
```

## Figure S4: Distribution over drugs

`get_distribution()` determines the number of drugs in which a given HCP or peptide has been detected.

```
get_distribution <- function(df, member_col) {  
  df %>%  
    filter(sample == "F+W", type == "HCPs") %>%  
    group_by({member_col}) %>%  
    summarise(n_drugs = n_distinct(drug)) %>%  
    count(n_drugs)  
}  
  
distribution_over_drugs <-  
  bind_rows(  
    HCPs =  
      hcp_abundances_workflow %>%  
      get_distribution(protein),  
    Peptides =  
      peptide_abundances_workflow %>%  
      get_distribution(sequence),  
    .id = "type"  
  )
```

The following HCPs have been detected in at least four drugs:

```
protein_data %>%  
  inner_join(  
    hcp_abundances_workflow %>%  
      filter(sample == "F+W", type == "HCPs") %>%  
      group_by(protein) %>%  
      summarise(n_drugs = n_distinct(drug)) %>%  
      filter(n_drugs >= 4),  
    by = c(entry = "protein")  
  ) %>%  
  select(entry, n_drugs) %>%  
  arrange(n_drugs) %>%  
  knitr::kable()
```

| entry  | n_drugs |
|--------|---------|
| G3GU09 | 4       |
| G3I4Z7 | 4       |
| G3HAC6 | 5       |
| G3HG75 | 5       |
| G3HL18 | 5       |

The following peptides have been detected in at least four drugs:

```
peptide_abundances_workflow %>%
  filter(sample == "F+W", type == "HCPs") %>%
  group_by(sequence) %>%
  summarise(n_drugs = n_distinct(drug)) %>%
  filter(n_drugs >= 4) %>%
  arrange(n_drugs) %>%
  knitr::kable()
```

| sequence             | n_drugs |
|----------------------|---------|
| SFVLNLGK             | 4       |
| AALITETLQLSR         | 5       |
| TLDNDIMLIKLASPVTLSNR | 5       |
| TLLEAENSR            | 5       |

Draw a bar chart summarizing this data.

```
distribution_over_drugs %>%
  ggplot(aes(n_drugs, n)) +
  geom_col(aes(fill = factor(n_drugs)), show.legend = FALSE) +
  scale_y_continuous(
    name = "Number of identifications",
    expand = expansion(c(0, .05))
  ) +
  scale_fill_brewer(palette = "RdPu") +
  facet_wrap(vars(type), scales = "free_y") +
  xlab("Number of drug products with identifications") +
  theme_bw() +
  theme(
    axis.ticks.x = element_blank(),
    panel.border = element_blank(),
    panel.grid.major.x = element_blank(),
    panel.grid.minor.x = element_blank(),
```

```

panel.grid.minor.y = element_blank(),
strip.background = element_blank(),
strip.placement = "outside",
strip.text = element_text(face = "bold")
)

```

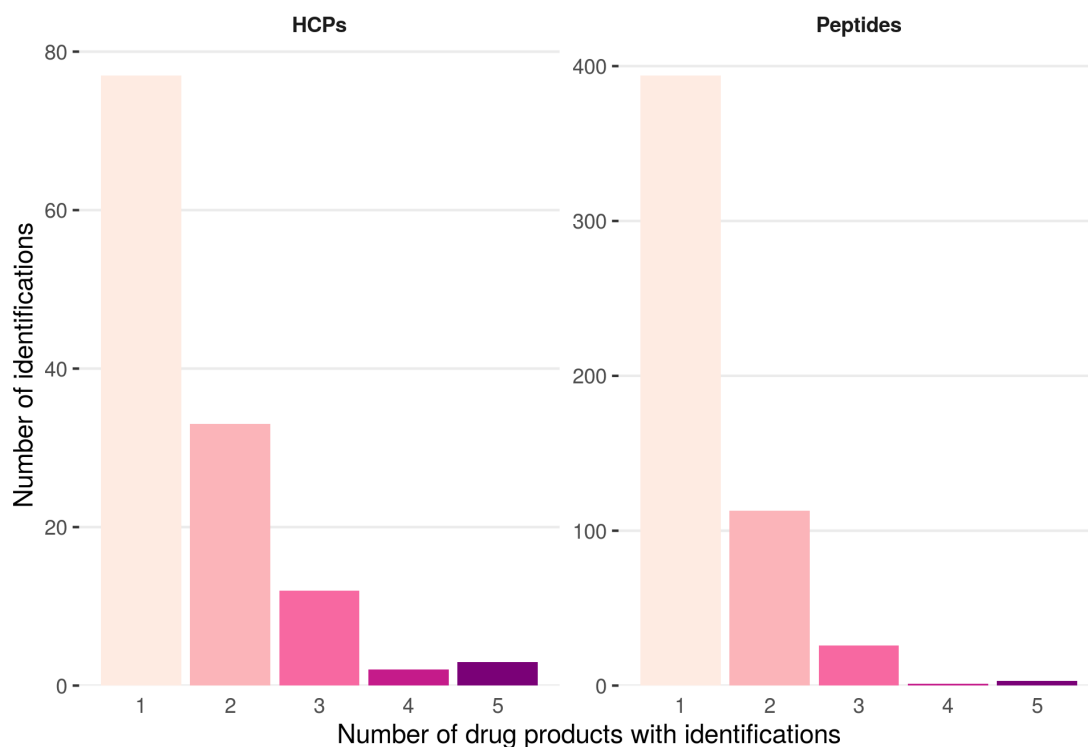

```

ggsave_default("figure_S4", width = 12, height = 10)

```

### Figure S5: Overlap flow-through/wash

The following auxiliary functions prepare data for plotting the number of HCPs and peptides shared between the flow-through and wash fractions.

```

get_overlap_data <- function(df, member_col) {
  df %>%
    filter(
      type == "HCPs",
      !str_starts(sample, "D"),
    ) %>%
    mutate(sample = str_c(drug, str_sub(sample, 1, 1))) %>%
    jaccard_matrix(member_col = {{member_col}}, as_matrix = FALSE) %>%

```

```

rename(members_f = members_x, members_w = members_y) %>%
filter(
  str_sub(x, end = -2) == str_sub(y, end = -2),
  str_sub(x, -1, -1) == "F",
  str_sub(y, -1, -1) == "W"
) %>%
mutate(
  drug = str_sub(x, end = -2),
  size_f_exclusive = pmap_int(
    .,
    function(members_f, members_w, ...) {
      members_f %>% setdiff(members_w) %>% length()
    }
  ),
  size_w_exclusive = pmap_int(
    .,
    function(members_f, members_w, ...) {
      members_w %>% setdiff(members_f) %>% length
    }
  ),
) %>%
select(drug, starts_with("size"))
}

get_overlap_data_bar <- function(df) {
  df %>%
  mutate(size_intersection_half = size_intersection / 2) %>%
  pivot_longer(
    -drug,
    names_to = "measure",
    names_prefix = "size_",
    values_to = "n"
  )
}

get_overlap_data_label <- function(df) {
  df %>%
  mutate(
    labelpos_intersection = 0,
    labelpos_w_exclusive = -size_intersection / 2 + 2,
    labelpos_f_exclusive = size_intersection / 2 - 2,
    hjust_intersection = .5,
    hjust_w_exclusive = 0,

```

```

    hjust_f_exclusive = 1,
    color_intersection = "grey40",
    color_w_exclusive = "#d95f02",
    color_f_exclusive = "#1b9e77",
  ) %>%
select(-size_union) %>%
pivot_longer(
  -drug,
  names_to = c(".value", "measure"),
  names_pattern = "([^-_]+)_(.+)",
  values_to = "value"
)
}

```

Plot these numbers of overlapping detections.

```

overlap_data_hcp <-
  hcp_abundances %>%
  get_overlap_data(member_col = protein)

overlap_data_peptide <-
  peptide_abundances %>%
  get_overlap_data(member_col = sequence)

overlap_data_bar <-
  bind_rows(
    HCPs =
      overlap_data_hcp %>%
      get_overlap_data_bar(),
    Peptides =
      overlap_data_peptide %>%
      get_overlap_data_bar(),
    .id = "type"
  ) %>%
  recode_dp_names()

overlap_data_label <-
  bind_rows(
    HCPs =
      overlap_data_hcp %>%
      get_overlap_data_label(),
    Peptides =
      overlap_data_peptide %>%
      get_overlap_data_label(),
  )

```



```

    .id = "type"
  ) %>%
  recode_dp_names()

ggplot(mapping = aes(drug)) +
  geom_col(
    data =
      overlap_data_bar %>%
      filter(measure %in% c("intersection_half", "f_exclusive")),
    aes(y = n, fill = measure),
    width = .45
  ) +
  geom_col(
    data =
      overlap_data_bar %>%
      filter(measure %in% c("intersection_half", "w_exclusive")),
    aes(y = -n, fill = factor(measure) %>% fct_rev()),
    width = .45
  ) +
  geom_text(
    data = overlap_data_label,
    aes(y = labelpos, label = size, hjust = hjust, color = color)
  ) +
  scale_fill_manual(values = c("#1b9e77", "grey92", "#d95f02")) +
  scale_color_identity() +
  coord_flip(clip = "off") +
  facet_wrap(vars(type), scales = "free_x") +
  xlab("") +
  ylab("") +
  theme_bw() +
  theme(
    axis.ticks.x = element_blank(),
    axis.text.x = element_blank(),
    panel.grid = element_blank(),
    strip.background = element_blank(),
    strip.placement = "outside",
    strip.text = element_text(face = "bold")
  )
)

```

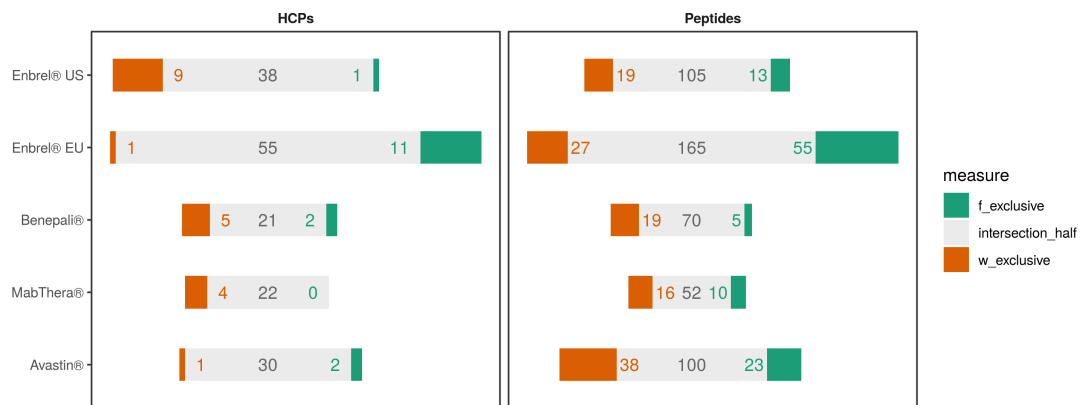

```
ggsave_default("figure_S5", width = 25, height = 10)
```

### Figure S6: Peptide Jaccard plots

Draw heatmaps for comparison of HCP peptide profiles on the level of drugs, ...

```
jaccard_data_peptide <-
  peptide_abundances %>%
  filter(
    type == "HCPs",
    !str_starts(sample, "D")
  )

jaccard_data_peptide %>%
  jaccard_matrix(sample_col = drug, member_col = sequence) %>%
  jaccard_heatmap(size = "large")
```

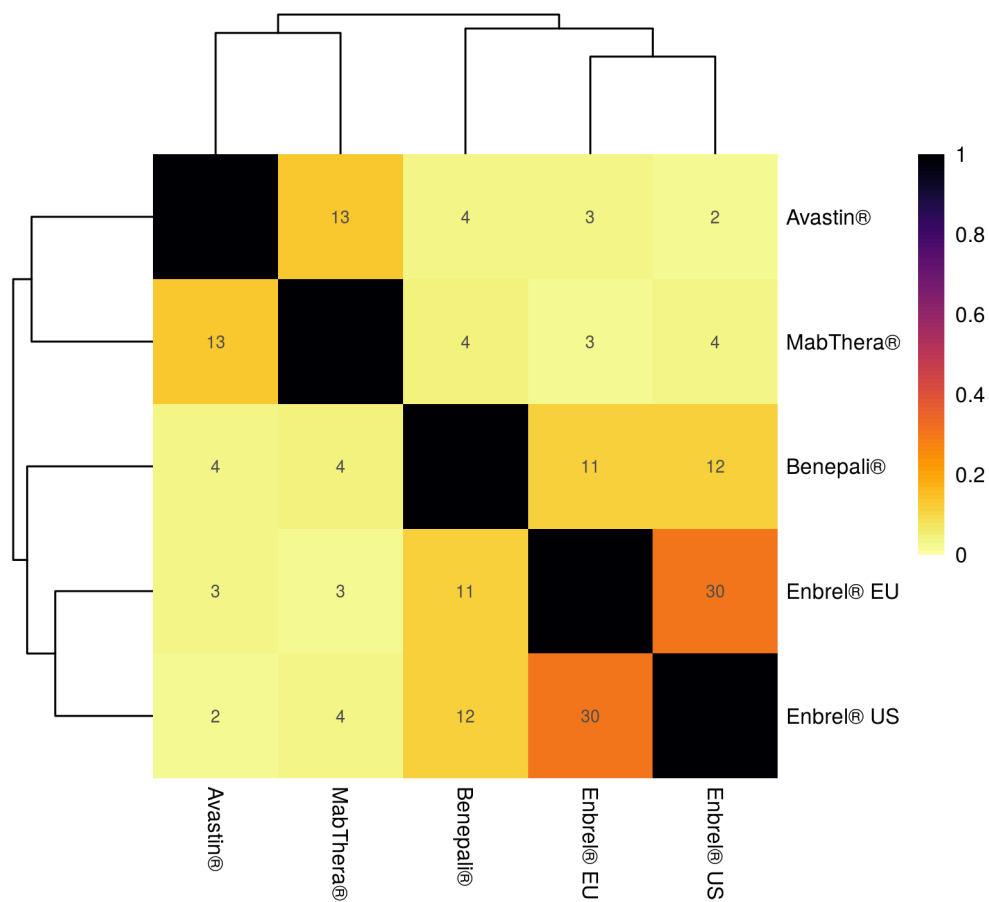

```
ggsave_default("figure_S6a", width = 13.6, height = 12.4)
```

... fractions, ...

```
jaccard_data_peptide %>%
  mutate(sample = str_c(drug, str_sub(sample, 1, 1), sep = "_")) %>%
  jaccard_matrix(member_col = sequence) %>%
  jaccard_heatmap(size = "medium")
```

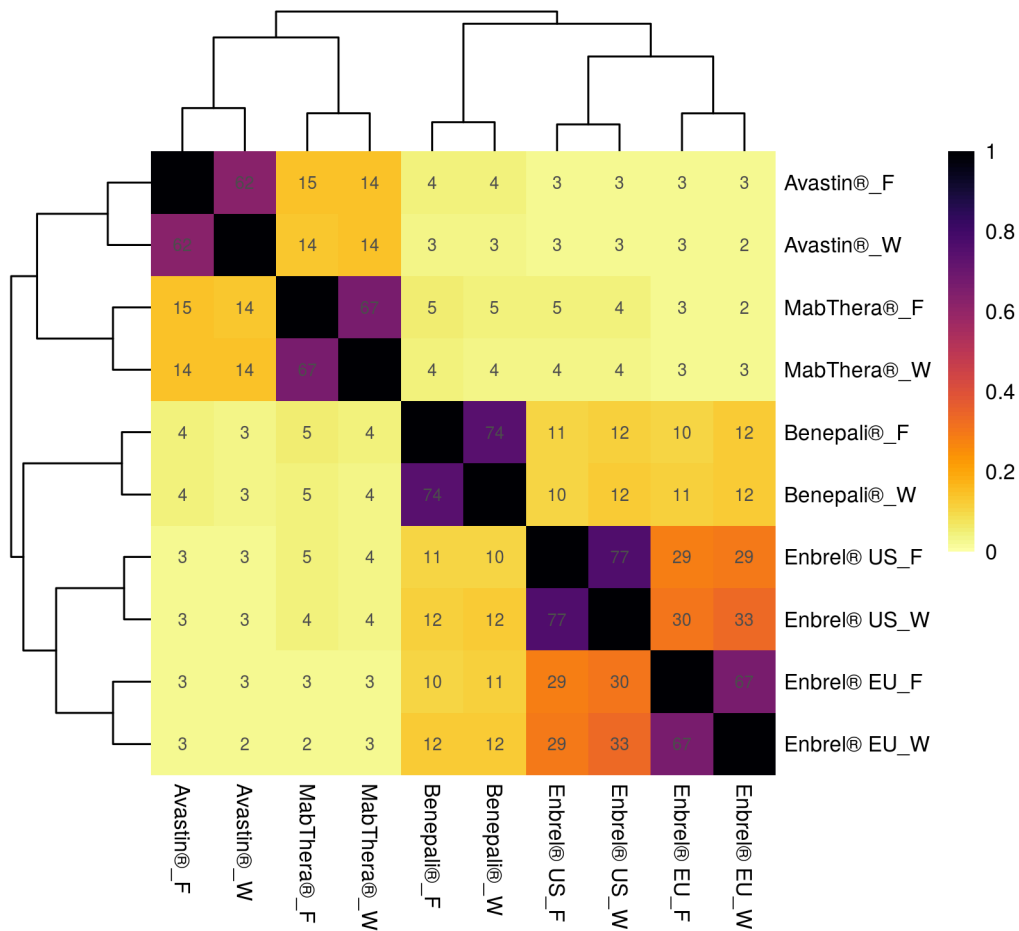

```
ggsave_default("figure_S6b", width = 13.6, height = 12.4)
```

... and replicates.

```
jaccard_data_peptide %>%
  unite(drug, sample, col = "sample") %>%
  jaccard_matrix(member_col = sequence) %>%
  jaccard_heatmap(size = "small")
```

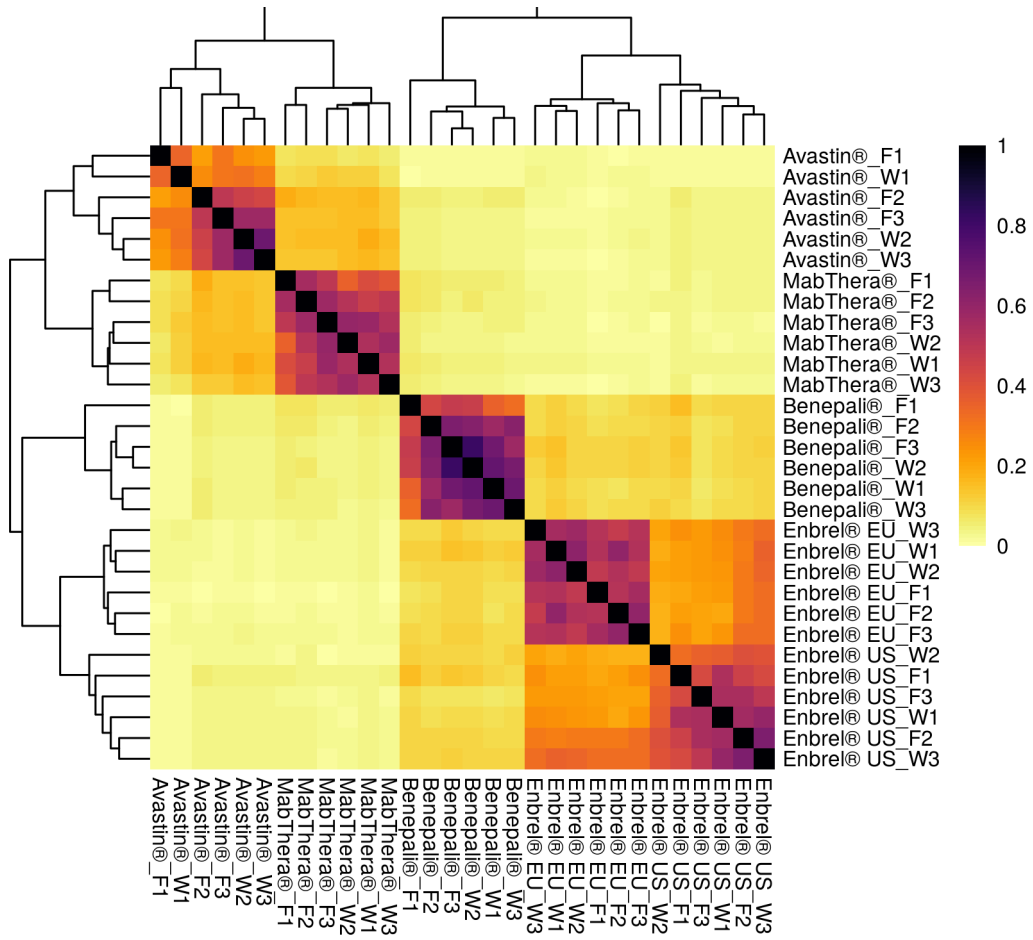

```
ggsave_default("figure_S6c", width = 13.6, height = 12.4)
```

## Session info

This section contains detailed information about the platform and packages that have been used for compiling the analyses.

```
devtools::session_info()
#> - Session info -----
#> setting value
#> version R version 3.6.3 (2020-02-29)
#> os Linux Mint 18.1
#> system x86_64, linux-gnu
#> ui X11
#> language (EN)
#> collate en_US.UTF-8
#> ctype en_US.UTF-8
#> tz Europe/Vienna
#> date 2020-06-16
#>
#> - Packages -----
#> package * version date lib source
#> assertthat 0.2.1 2019-03-21 [1] CRAN (R 3.6.0)
#> backports 1.1.5 2019-10-02 [1] CRAN (R 3.6.1)
#> BiocGenerics * 0.30.0 2019-05-02 [1] Bioconductor
#> Biostrings * 2.52.0 2019-05-02 [1] Bioconductor
#> broom 0.5.5 2020-02-29 [1] CRAN (R 3.6.2)
#> callr 3.4.3 2020-03-28 [1] CRAN (R 3.6.2)
#> cellranger 1.1.0 2016-07-27 [1] CRAN (R 3.6.0)
#> cli 2.0.2 2020-02-28 [1] CRAN (R 3.6.2)
#> codetools 0.2-16 2018-12-24 [4] CRAN (R 3.5.2)
#> colorspace 1.4-1 2019-03-18 [1] CRAN (R 3.6.0)
#> crayon 1.3.4 2017-09-16 [1] CRAN (R 3.6.0)
#> curl 4.3 2019-12-02 [1] CRAN (R 3.6.1)
#> DBI 1.1.0 2019-12-15 [1] CRAN (R 3.6.1)
#> dbplyr 1.4.2 2019-06-17 [1] CRAN (R 3.6.0)
#> desc 1.2.0 2018-05-01 [1] CRAN (R 3.6.0)
#> devtools 2.2.2 2020-02-17 [1] CRAN (R 3.6.2)
#> digest 0.6.25 2020-02-23 [1] CRAN (R 3.6.2)
#> dplyr * 0.8.5 2020-03-07 [1] CRAN (R 3.6.2)
#> ellipsis 0.3.0 2019-09-20 [1] CRAN (R 3.6.1)
#> evaluate 0.14 2019-05-28 [1] CRAN (R 3.6.0)
#> fansi 0.4.1 2020-01-08 [1] CRAN (R 3.6.2)
#> farver 2.0.3 2020-01-16 [1] CRAN (R 3.6.1)
#> forcats * 0.5.0 2020-03-01 [1] CRAN (R 3.6.2)
#> fs * 1.3.2 2020-03-05 [1] CRAN (R 3.6.2)
```

```

#> gdtools      * 0.2.1  2019-10-14 [1] CRAN (R 3.6.1)
#> generics     0.0.2  2018-11-29 [1] CRAN (R 3.6.0)
#> ggplot2      * 3.3.0  2020-03-05 [1] CRAN (R 3.6.2)
#> glue         1.3.2  2020-03-12 [1] CRAN (R 3.6.2)
#> gridExtra    2.3    2017-09-09 [1] CRAN (R 3.6.0)
#> gtable       0.3.0  2019-03-25 [1] CRAN (R 3.6.0)
#> haven        2.2.0  2019-11-08 [1] CRAN (R 3.6.1)
#> highr        0.8    2019-03-20 [1] CRAN (R 3.6.0)
#> hms          0.5.3  2020-01-08 [1] CRAN (R 3.6.1)
#> htmltools    0.4.0  2019-10-04 [1] CRAN (R 3.6.1)
#> httr         * 1.4.1  2019-08-05 [1] CRAN (R 3.6.0)
#> IRanges      * 2.18.1 2019-05-31 [1] Bioconductor
#> janitor      * 1.2.1  2020-01-22 [1] CRAN (R 3.6.1)
#> jsonlite     1.6.1  2020-02-02 [1] CRAN (R 3.6.1)
#> knitr        1.28   2020-02-06 [1] CRAN (R 3.6.1)
#> labeling     0.3    2014-08-23 [1] CRAN (R 3.6.0)
#> lattice      0.20-41 2020-04-02 [4] CRAN (R 3.6.3)
#> lifecycle    0.2.0  2020-03-06 [1] CRAN (R 3.6.2)
#> lubridate    1.7.4  2018-04-11 [1] CRAN (R 3.6.0)
#> magrittr     1.5    2014-11-22 [1] CRAN (R 3.6.0)
#> memoise      1.1.0  2017-04-21 [1] CRAN (R 3.6.0)
#> modelr       0.1.6  2020-02-22 [1] CRAN (R 3.6.2)
#> munsell      0.5.0  2018-06-12 [1] CRAN (R 3.6.0)
#> nlme         3.1-147 2020-04-13 [4] CRAN (R 3.6.3)
#> pheatmap     * 1.0.12 2019-01-04 [1] CRAN (R 3.6.0)
#> pillar       1.4.3  2019-12-20 [1] CRAN (R 3.6.1)
#> pkgbuild     1.0.6  2019-10-09 [1] CRAN (R 3.6.1)
#> pkgconfig    2.0.3  2019-09-22 [1] CRAN (R 3.6.1)
#> pkgload      1.0.2  2018-10-29 [1] CRAN (R 3.6.0)
#> prettyunits  1.1.1  2020-01-24 [1] CRAN (R 3.6.1)
#> processx     3.4.2  2020-02-09 [1] CRAN (R 3.6.1)
#> ps           1.3.2  2020-02-13 [1] CRAN (R 3.6.2)
#> purrr        * 0.3.3  2019-10-18 [1] CRAN (R 3.6.1)
#> R6           2.4.1  2019-11-12 [1] CRAN (R 3.6.1)
#> RColorBrewer 1.1-2   2014-12-07 [1] CRAN (R 3.6.0)
#> Rcpp         1.0.4  2020-03-17 [1] CRAN (R 3.6.2)
#> readr        * 1.3.1  2018-12-21 [1] CRAN (R 3.6.0)
#> readxl       1.3.1  2019-03-13 [1] CRAN (R 3.6.0)
#> remotes      2.1.1  2020-02-15 [1] CRAN (R 3.6.2)
#> reprex       0.3.0  2019-05-16 [1] CRAN (R 3.6.0)
#> rlang        0.4.5  2020-03-01 [1] CRAN (R 3.6.2)
#> rmarkdown    2.1    2020-01-20 [1] CRAN (R 3.6.1)
#> rprojroot    1.3-2   2018-01-03 [1] CRAN (R 3.6.0)

```

```

#> rstudioapi      0.11    2020-02-07 [1] CRAN (R 3.6.1)
#> rvest           0.3.5    2019-11-08 [1] CRAN (R 3.6.1)
#> S4Vectors       * 0.22.0  2019-05-02 [1] Bioconductor
#> scales          1.1.0    2019-11-18 [1] CRAN (R 3.6.1)
#> sessioninfo     1.1.1    2018-11-05 [1] CRAN (R 3.6.0)
#> snakecase       0.11.0   2019-05-25 [1] CRAN (R 3.6.1)
#> stringi         1.4.6    2020-02-17 [1] CRAN (R 3.6.2)
#> stringr         * 1.4.0    2019-02-10 [1] CRAN (R 3.6.0)
#> svglite         1.2.3    2020-02-07 [1] CRAN (R 3.6.1)
#> systemfonts     0.1.1    2019-07-01 [1] CRAN (R 3.6.1)
#> testthat       2.3.2    2020-03-02 [1] CRAN (R 3.6.2)
#> tibble          * 3.0.0    2020-03-30 [1] CRAN (R 3.6.2)
#> tidyr           * 1.0.2    2020-01-24 [1] CRAN (R 3.6.1)
#> tidyselect      1.0.0    2020-01-27 [1] CRAN (R 3.6.1)
#> tidyverse       * 1.3.0    2019-11-21 [1] CRAN (R 3.6.1)
#> usethis         1.5.1    2019-07-04 [1] CRAN (R 3.6.0)
#> vctrs           0.2.4    2020-03-10 [1] CRAN (R 3.6.2)
#> viridis         * 0.5.1    2018-03-29 [1] CRAN (R 3.6.0)
#> viridisLite    * 0.3.0    2018-02-01 [1] CRAN (R 3.6.0)
#> withr          2.1.2    2018-03-15 [1] CRAN (R 3.6.0)
#> xfun            0.12     2020-01-13 [1] CRAN (R 3.6.1)
#> xml2           1.2.5    2020-03-11 [1] CRAN (R 3.6.2)
#> XVector        * 0.24.0   2019-05-02 [1] Bioconductor
#> yaml            2.2.1    2020-02-01 [1] CRAN (R 3.6.1)
#> zlibbioc       1.30.0   2019-05-02 [1] Bioconductor
#>
#> [1] /home/wolfgang/Programme/R/3.6
#> [2] /usr/local/lib/R/site-library
#> [3] /usr/lib/R/site-library
#> [4] /usr/lib/R/library

```



## References

- (1) Shafranovich, Y. *Common Format and Mime Type for Comma-Separated Values (Csv) Files*; RFC 4180; RFC Editor; Internet Requests for Comments; RFC Editor, 2005.
- (2) Xie, Y.; Allaire, J.; Grolemond, G. *R Markdown: The Definitive Guide*; Chapman; Hall/CRC: Boca Raton, Florida, 2018.
- (3) Xie, Y. *Dynamic Documents with R and Knitr*, 2nd ed.; Chapman; Hall/CRC: Boca Raton, Florida, 2015.
- (4) R Core Team. *R: A Language and Environment for Statistical Computing*; R Foundation for Statistical Computing: Vienna, Austria, 2018.
- (5) Wickham, H.; Averick, M.; Bryan, J.; Chang, W.; McGowan, L.; François, R.; Grolemond, G.; Hayes, A.; Henry, L.; Hester, J.; Kuhn, M.; Pedersen, T.; Miller, E.; Bache, S.; Müller, K.; Ooms, J.; Robinson, D.; Seidel, D.; Spinu, V.; Takahashi, K.; Vaughan, D.; Wilke, C.; Woo, K.; Yutani, H. Welcome to the Tidyverse. *J. Open Source Softw.* **2019**, *4* (43), 1686.
- (6) Amezquita, R. A.; Lun, A. T. L.; Becht, E.; Carey, V. J.; Carpp, L. N.; Geistlinger, L.; Marini, F.; Rue-Albrecht, K.; Risso, D.; Soneson, C.; Waldron, L.; Pagès, H.; Smith, M. L.; Huber, W.; Morgan, M.; Gottardo, R.; Hicks, S. C. Orchestrating Single-Cell Analysis with Bioconductor. *Nat. Methods* **2020**, *17*, 137–145.
- (7) Okabe, M.; Ito, K. *Color Universal Design (Cud): How to Make Figures and Presentations That Are Friendly to Colorblind People*; J\*FLY, 2008.
- (8) Harrower, M. A.; Brewer, C. A. ColorBrewer.org: An Online Tool for Selecting Color Schemes for Maps. *Cartogr. J.* **2003**, *40* (1), 27–37.
